# Supplementary material
Source: MDPI journal article supplement (https://www.mdpi.com/2305-6320/5/3/85)
Supplement: s1 [file s1]

# Individual differences in responsiveness to acupuncture: an exploratory survey of practitioner opinion

David F. Mayor <sup>1,\*</sup>, Lara S. McClure <sup>2</sup> and J. Helgi Clayton McClure <sup>2</sup>

<sup>1</sup> Department of Allied Health Professions and Midwifery, School of Health and Social Work, University of Hertfordshire, Hatfield AL10 9AB, UK

<sup>2</sup> Northern College of Acupuncture, York YO1 6LJ, UK; LaraMcClure@chinese-medicine.co.uk (L.S.M.); helgi.claytonmcclure@oxon.org (J.H.C.M.)

\* Correspondence: davidmayor@welwynacupuncture.co.uk; Tel.: +44-1707-320782

Received: date; Accepted: date; Published: date

## Supplementary Materials I. Survey questions and results, in summary

(Note that these results do not include those from the four members of the focus group who completed the survey before the official start date.)

# Survey on patients' response to acupuncture (revised)

Showing 110 of 110 responses

Showing **all** responses

Showing **all** questions

Response rate: 22%

- 1** I have read and understood the text above, confirm that the data I provide can be used for the stated purposes of this project, and that I consent to take part in the survey voluntarily.

Yes  110 (100%)  
No | 0

- 2** Your age (in years)

Showing 5 of 110 responses

|    |                                        |
|----|----------------------------------------|
| 28 | <a href="#">298348-298340-26107614</a> |
| 52 | <a href="#">298348-298340-26269325</a> |
| 36 | <a href="#">298348-298340-26471564</a> |
| 57 | <a href="#">298348-298340-26471588</a> |
| 59 | <a href="#">298348-298340-26471554</a> |

- 3** Your gender

Female  77 (70%)  
Male  33 (30%)  
I'd rather not say | 0

- 4** What do you consider as your main profession?

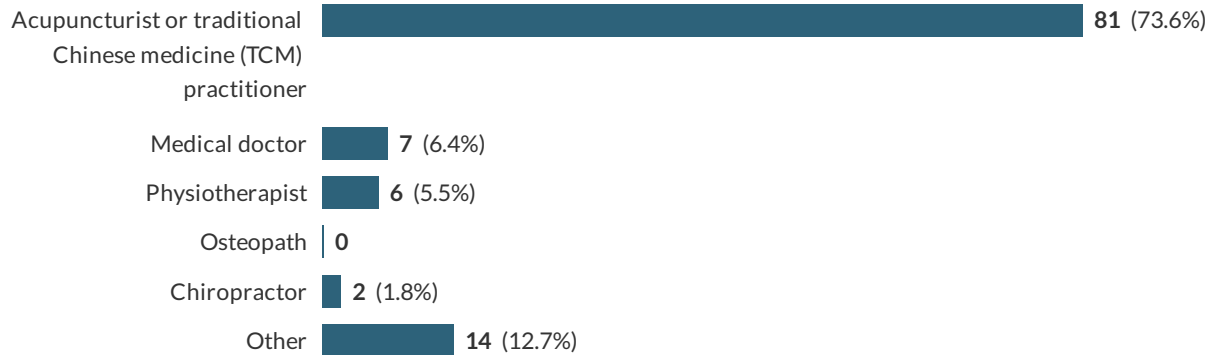

4.a If you selected 'Other', please specify.

| Showing 5 of 16 responses                 |                                        |
|-------------------------------------------|----------------------------------------|
| Physical therapist/Acupuncturist          | <a href="#">298348-298340-26489299</a> |
| Dental Hygienist                          | <a href="#">298348-298340-26681817</a> |
| Nurse                                     | <a href="#">298348-298340-26774925</a> |
| Sister in Pain Management                 | <a href="#">298348-298340-26786544</a> |
| Advanced Nurse Practitioner/Acupuncturist | <a href="#">298348-298340-27443875</a> |

5 With which organisation did you do most of your acupuncture training?

| Showing 5 of 109 responses       |                                        |
|----------------------------------|----------------------------------------|
| The Academy of Oriental Medicine | <a href="#">298348-298340-26107614</a> |
| Acupuncture Academy              | <a href="#">298348-298340-26269325</a> |
| AACP                             | <a href="#">298348-298340-26471564</a> |
| BMAS                             | <a href="#">298348-298340-26471588</a> |
| CICM                             | <a href="#">298348-298340-26471554</a> |

6 Which of these UK professional acupuncture or Chinese Medicine associations do you belong to? (You may indicate more than one.)

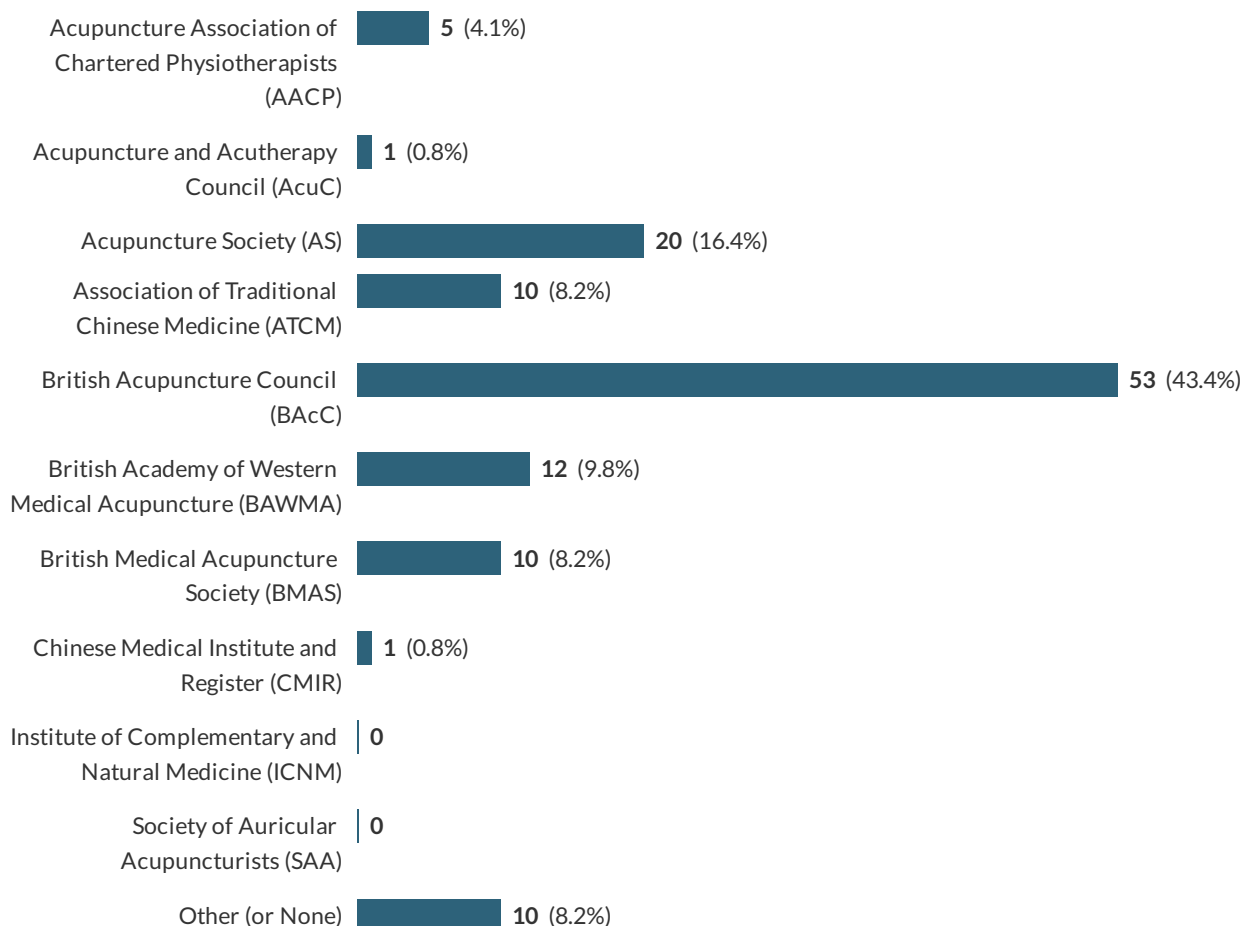

6.a If you selected 'Other (or None)', please specify.

| Showing 5 of 10 responses                              |                                        |
|--------------------------------------------------------|----------------------------------------|
| BRCP - British Register of Complementary Practitioners | <a href="#">298348-298340-26107614</a> |
| Federation of Holistic Therapists (FHT)                | <a href="#">298348-298340-26489299</a> |
| I have continued to do training with Yuan clinic       | <a href="#">298348-298340-26774925</a> |
| CNHC                                                   | <a href="#">298348-298340-26932256</a> |
| ATCM                                                   | <a href="#">298348-298340-29253227</a> |

7 What style/s of acupuncture do you use most? (You may indicate more than one.)

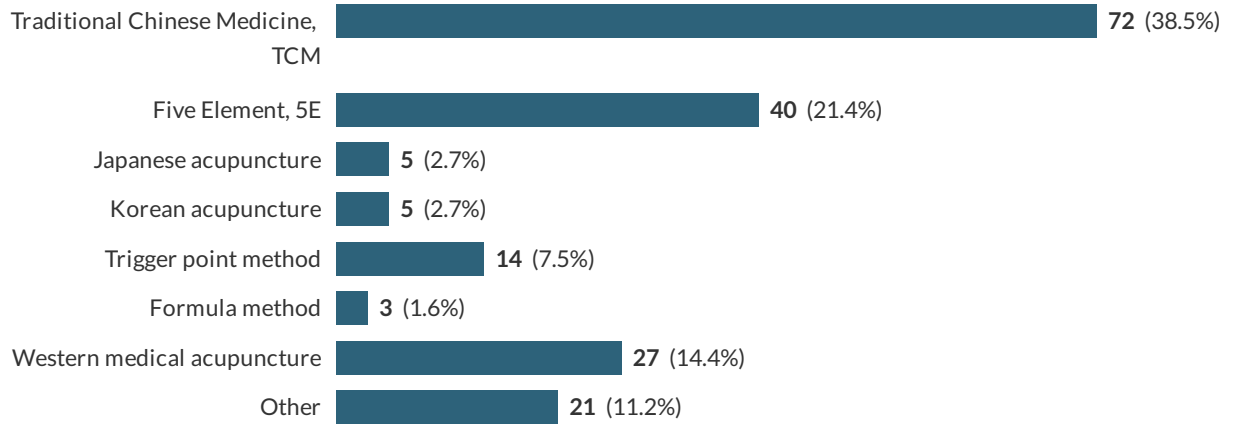

7.a If you selected 'Other', please specify.

| Showing 5 of 22 responses                   |                                        |
|---------------------------------------------|----------------------------------------|
| Si Yuan / Dr Tan Balance Method Acupuncture | <a href="#">298348-298340-26107614</a> |
| FSN                                         | <a href="#">298348-298340-26471554</a> |
| Neijing channel                             | <a href="#">298348-298340-26910831</a> |
| DNA (Bob Doane)                             | <a href="#">298348-298340-26924099</a> |
| Dr Tan Balanced acupuncture                 | <a href="#">298348-298340-26948161</a> |

8 How many years have you used acupuncture in your practice?

| Showing 5 of 110 responses |                                        |
|----------------------------|----------------------------------------|
| 2                          | <a href="#">298348-298340-26107614</a> |
| 2                          | <a href="#">298348-298340-26269325</a> |
| 10                         | <a href="#">298348-298340-26471564</a> |
| 17                         | <a href="#">298348-298340-26471588</a> |
| 18                         | <a href="#">298348-298340-26471554</a> |

9 Before you knew about this survey, did you ever consider that patient characteristics (such as their temperament or personality traits) might affect their response to treatment?

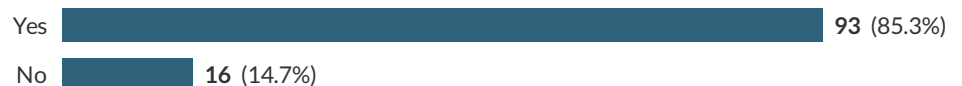

9.a If you answered 'Yes', please give details:

| Showing 5 of 89 responses                                                                                                                |                                        |
|------------------------------------------------------------------------------------------------------------------------------------------|----------------------------------------|
| Greater results have been observed for patients with expectation of a positive outcome and who enjoy the session                         | <a href="#">298348-298340-26107614</a> |
| Having read the John Hamwee book last year, I'd thought it may be connected to the patient CF (make up) but not explored more than that. | <a href="#">298348-298340-26269325</a> |
| Too broad to give a specific answer here.                                                                                                | <a href="#">298348-298340-26471554</a> |
| I had considered this carefully. but come to no obvious conclusion.                                                                      | <a href="#">298348-298340-26472615</a> |
| Must be willing to have acupuncture. Belief is irrelevant.                                                                               | <a href="#">298348-298340-26488000</a> |

## Particular patient characteristics for you to consider

10 Particular patient characteristics, attitudes or experience that you think may contribute to how well (or poorly) they respond to acupuncture. (Information on those that are asterisked can be found under 'More Info', above.)

10.1 Gender

10.1.a Gender - What you THINK NOW affects response

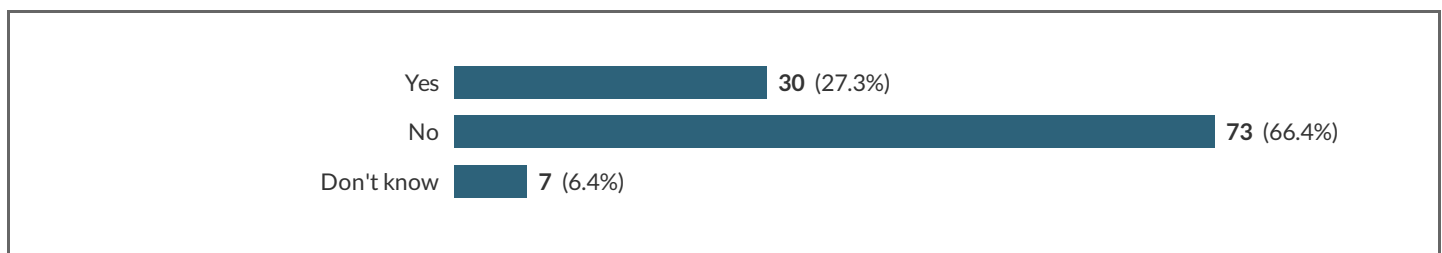

10.1.b Gender - What you THOUGHT THEN (in clinic) affected response

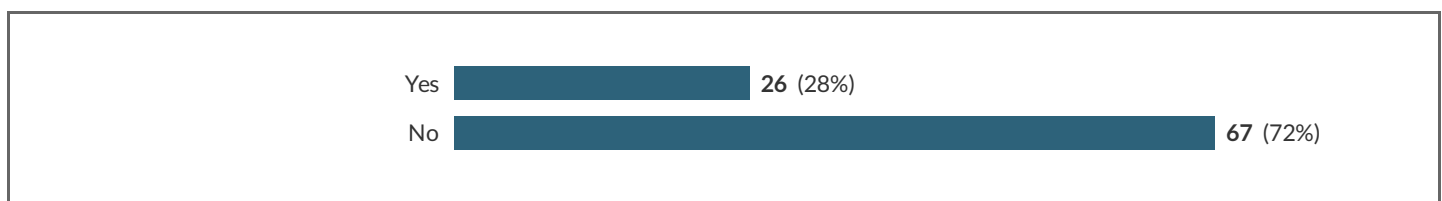

10.1.c Gender - Space for your comments

| Showing 5 of 21 responses                                                                                                                                                               |                                        |
|-----------------------------------------------------------------------------------------------------------------------------------------------------------------------------------------|----------------------------------------|
| I have always believed male and female have the same chance of successful acupuncture                                                                                                   | <a href="#">298348-298340-26786544</a> |
| Men more often look for direct results relating to presenting condition. Women see other holistic benefits.                                                                             | <a href="#">298348-298340-26922494</a> |
| statistics show that women are more likely to seek treatment anyway, so that will possibly show some bias in response.                                                                  | <a href="#">298348-298340-27190466</a> |
| to answer this with yes and no seems illconceived to me. I do find women respond better, but only if they are more openminded and less 'locked in' emotionally, which not all women are | <a href="#">298348-298340-26999243</a> |
| It's not that gender affects the treatment, more that I see less men in clinic so it biases the sample in terms of how well men versus women respond to acupuncture                     | <a href="#">298348-298340-28415546</a> |

## 10.2 Age

### 10.2.a Age - What you THINK NOW affects response

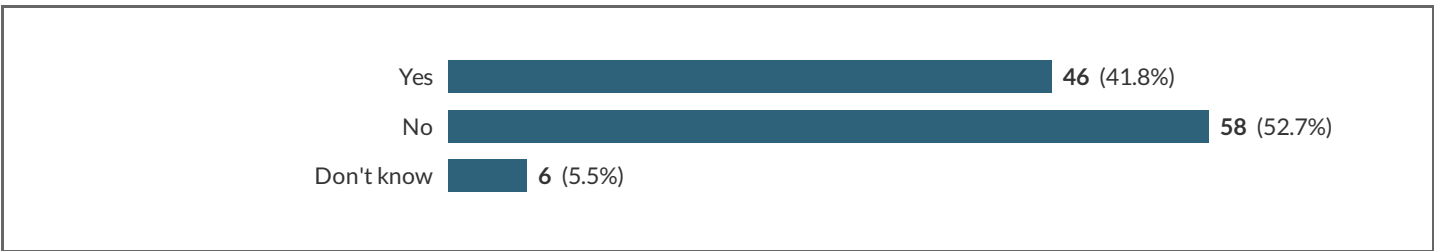

### 10.2.b Age - What you THOUGHT THEN (in clinic) affected response

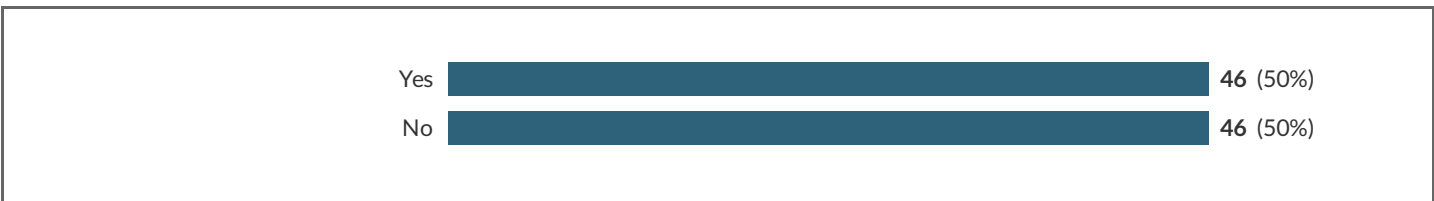

### 10.2.c Age - Space for your comments

| Showing 5 of 22 responses                                                                                                                                                        |                                        |
|----------------------------------------------------------------------------------------------------------------------------------------------------------------------------------|----------------------------------------|
| Younger patients tend to have less complex conditions to treat so tend to respond more quickly to treatment                                                                      | <a href="#">298348-298340-26546219</a> |
| Someone who is very elderly and in a very poor state of health may not respond so well.                                                                                          | <a href="#">298348-298340-26670536</a> |
| Older people, over 70's, seem less open to change and if on much medication may slow down response time to treatment.                                                            | <a href="#">298348-298340-26922494</a> |
| I find the older generation harder to commit to treatment especially if their doctor is also involved. They tend to want to stop and see what happens with the Western approach. | <a href="#">298348-298340-26997929</a> |
| multiple comorbidities and multiple medications are probably a factor in response to treatment in elderly.                                                                       | <a href="#">298348-298340-27190466</a> |

### 10.3 Ethnicity

#### 10.3.a Ethnicity - What you THINK NOW affects response

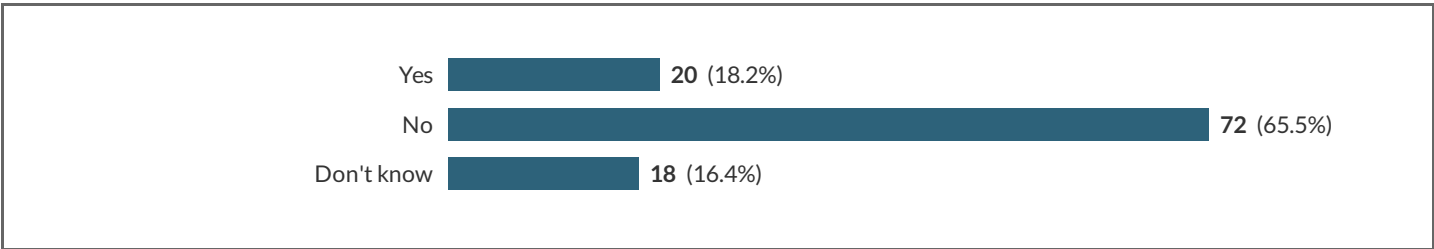

#### 10.3.b Ethnicity - What you THOUGHT THEN (in clinic) affected response

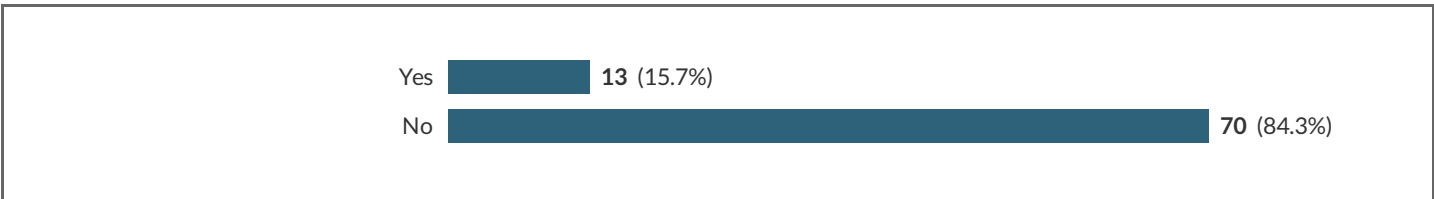

#### 10.3.c Ethnicity - Space for your comments



| Showing 5 of 11 responses                                                                                                                                     |                                        |
|---------------------------------------------------------------------------------------------------------------------------------------------------------------|----------------------------------------|
| Caucasians seem keener                                                                                                                                        | <a href="#">298348-298340-26971511</a> |
| Generally Asian over 70 females being cared for by family. Looking for sympathy and attention. If they get better they loose some connection with their carer | <a href="#">298348-298340-26997929</a> |
| because if my work in the NHS I have treated a variety of nationalities and have not noticed a strong ethnic bias in response.                                | <a href="#">298348-298340-27190466</a> |
| I now have a greater understanding of how the concept of privilege impacts on BMAE population.                                                                | <a href="#">298348-298340-28048449</a> |
| Some cultures seem more open to treatment and seek acupuncture for assistance.                                                                                | <a href="#">298348-298340-29037670</a> |

#### 10.4 Birth and prenatal experience

##### 10.4.a Birth and prenatal experience - What you THINK NOW affects response

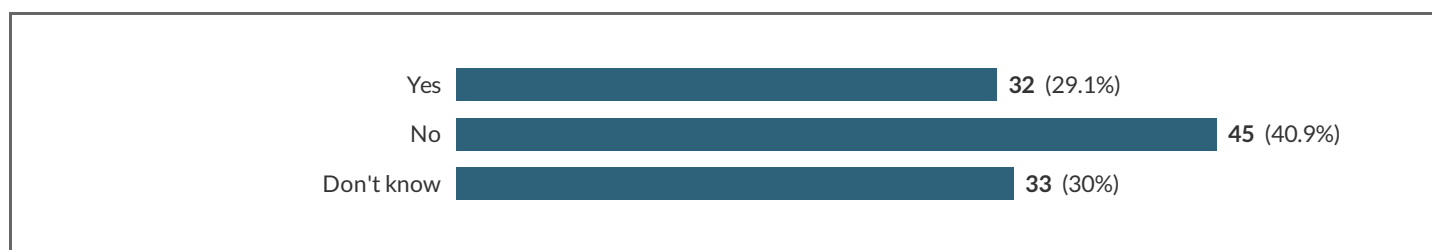

##### 10.4.b Birth and prenatal experience - What you THOUGHT THEN (in clinic) affected response

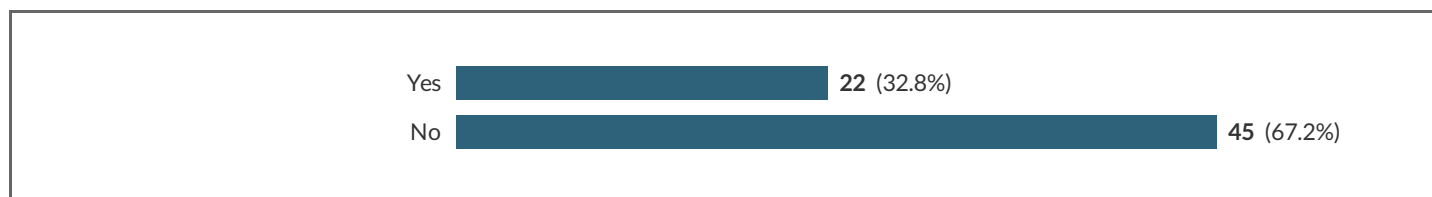

##### 10.4.c Birth and prenatal experience - Space for your comments

| Showing 5 of 13 responses                                                                                                                                                                                                      |                                        |
|--------------------------------------------------------------------------------------------------------------------------------------------------------------------------------------------------------------------------------|----------------------------------------|
| Except potentially for pre-natal Jing deficiency, acupuncture might not be the best method as could be draining, it would also take a lot of sessions to see significant results.                                              | <a href="#">298348-298340-26107614</a> |
| Situations such as where the parents are old and the patients Jing is compromised may not respond as well.                                                                                                                     | <a href="#">298348-298340-26670536</a> |
| Many had in labour                                                                                                                                                                                                             | <a href="#">298348-298340-26971511</a> |
| many difficult-to-resolve blockages are probably affected by birth and prenatal experiences                                                                                                                                    | <a href="#">298348-298340-26999243</a> |
| In theory at first re: from jing upwards and condition of parents but more so now after seeing children of older parents and condition of lung and kidney qi on children of some difficult IVF or supported fertility programs | <a href="#">298348-298340-29225890</a> |

## 10.5 Character as a baby, child or adolescent

### 10.5.a Character as a baby, child or adolescent - What you THINK NOW affects response

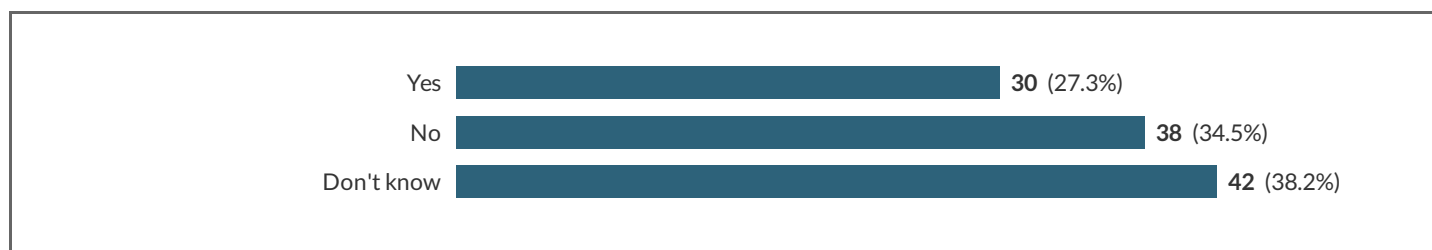

### 10.5.b Character as a baby, child or adolescent - What you THOUGHT THEN (in clinic) affected response

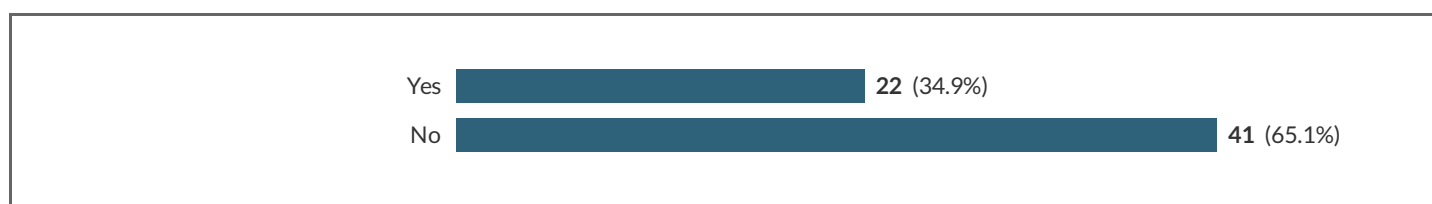

### 10.5.c Character as a baby, child or adolescent - Space for your comments

| Showing 5 of 8 responses                                                                                                                                                                                    |                                        |
|-------------------------------------------------------------------------------------------------------------------------------------------------------------------------------------------------------------|----------------------------------------|
| see above                                                                                                                                                                                                   | <a href="#">298348-298340-26999243</a> |
| may enhance response or make hypersensitive                                                                                                                                                                 | <a href="#">298348-298340-27904971</a> |
| Some people seem more open to complementary therapies.                                                                                                                                                      | <a href="#">298348-298340-29037670</a> |
| I think once I have explained to the patient how acupuncture works they are likely to try it. I often ask for feed back using mymop forms. Feedback is more people should know about how acupuncture works! | <a href="#">298348-298340-29668534</a> |
| N/A as I don't treat babies, children or adolescents in my clinic with Acupuncture                                                                                                                          | <a href="#">298348-298340-29709659</a> |

## 10.6 Childhood health

### 10.6.a Childhood health - What you THINK NOW affects response

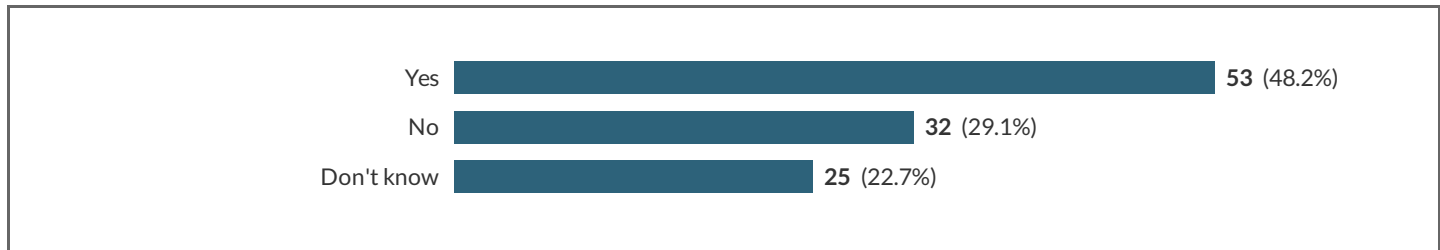

### 10.6.b Childhood health - What you THOUGHT THEN (in clinic) affected response

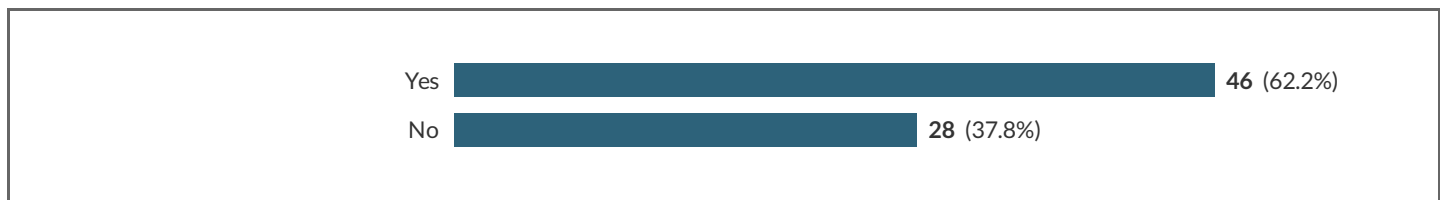

### 10.6.c Childhood health - Space for your comments

| Showing 5 of 12 responses                                                                                       |                                        |
|-----------------------------------------------------------------------------------------------------------------|----------------------------------------|
| Can impact the constitution and health but should not impact the response to the treatment.                     | <a href="#">298348-298340-26107614</a> |
| If people have had chronic health problems for a long time their response to treatment is generally not as good | <a href="#">298348-298340-26546219</a> |
| Patients in poor health as a child and coming to clinic in poor health can need much more long term treatment   | <a href="#">298348-298340-26670536</a> |
| Depending on values, illnesses foe example childhood injury can still bear affect of acupuncture                | <a href="#">298348-298340-26786544</a> |
| see above                                                                                                       | <a href="#">298348-298340-26999243</a> |

## 10.7 Family's health in patient's childhood

### 10.7.a Family's health in patient's childhood - What you THINK NOW affects response

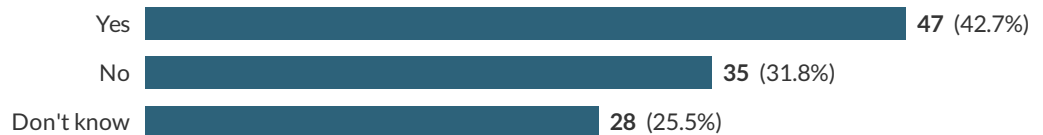

### 10.7.b Family's health in patient's childhood - What you THOUGHT THEN (in clinic) affected response

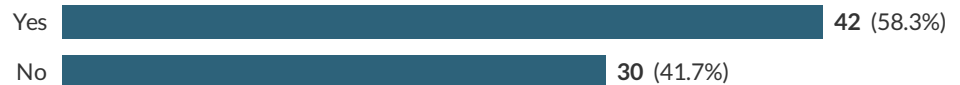

### 10.7.c Family's health in patient's childhood - Space for your comments

| Showing 5 of 12 responses                                                                                                                                                         |                                        |
|-----------------------------------------------------------------------------------------------------------------------------------------------------------------------------------|----------------------------------------|
| Can impact the constitution and health but should not impact the response to the treatment.                                                                                       | <a href="#">298348-298340-26107614</a> |
| From working in a paediatric acupuncture clinic I can see how the families' health can impact on a childs                                                                         | <a href="#">298348-298340-26546219</a> |
| As above                                                                                                                                                                          | <a href="#">298348-298340-26786544</a> |
| not sure I would factor that in to my treatment but often it is the effect this can have on their mental health can be more significant tha on their physical health.             | <a href="#">298348-298340-27190466</a> |
| another fuzzy question. If you mean genetic weaknesses, then certainly. If you mean family dynamics, then that affects the treatment outcome also, but for very different reasons | <a href="#">298348-298340-26999243</a> |

## 10.8 Childhood poverty

### 10.8.a Childhood poverty - What you THINK NOW affects response

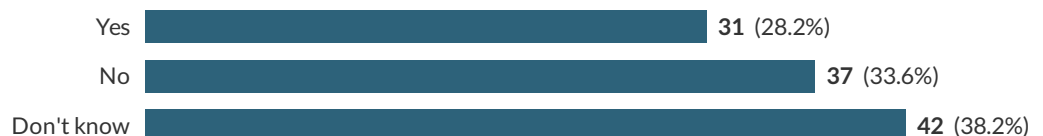

#### 10.8.b Childhood poverty - What you THOUGHT THEN (in clinic) affected response

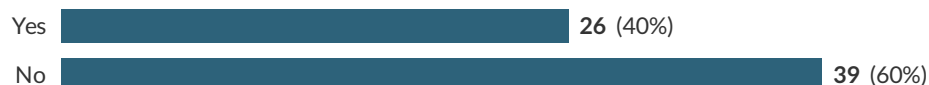

#### 10.8.c Childhood poverty - Space for your comments

| Showing 5 of 6 responses                                                                                                                                                                         |                                        |
|--------------------------------------------------------------------------------------------------------------------------------------------------------------------------------------------------|----------------------------------------|
| Can impact the constitution and health but should not impact the response to the treatment.                                                                                                      | <a href="#">298348-298340-26107614</a> |
| pretty obvious as disease factors, but do they affect the response to acupuncture. I repeat: a patient with a healthy, balanced qi will respond better to acupuncture treatment and vice versa . | <a href="#">298348-298340-26999243</a> |
| Acupuncture often seen as a luxury treatment.                                                                                                                                                    | <a href="#">298348-298340-29720447</a> |
| I haven't dealt with anyone in this category                                                                                                                                                     | <a href="#">298348-298340-29772908</a> |
| I have not made any connection.                                                                                                                                                                  | <a href="#">298348-298340-30079001</a> |

#### 10.9 Childhood abuse, neglect, trauma or bereavement

##### 10.9.a Childhood abuse, neglect, trauma or bereavement - What you THINK NOW affects response

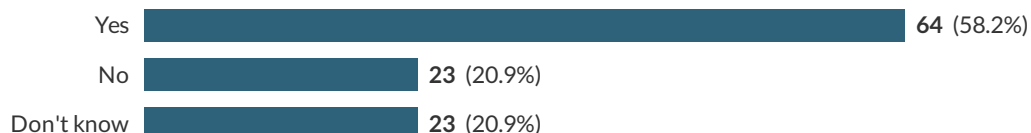

##### 10.9.b Childhood abuse, neglect, trauma or bereavement - What you THOUGHT THEN (in clinic) affected response

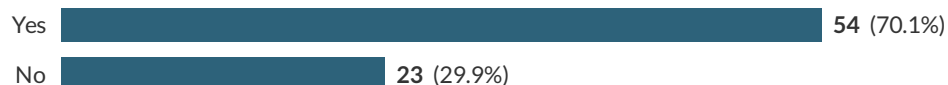

##### 10.9.c Childhood abuse, neglect, trauma or bereavement - Space for your comments

| Showing 5 of 14 responses                                                                                                                                        |                                        |
|------------------------------------------------------------------------------------------------------------------------------------------------------------------|----------------------------------------|
| Can impact the constitution and health but should not impact the response to the treatment.                                                                      | <a href="#">298348-298340-26107614</a> |
| A high proportion of patients I see have had a form of abuse as a child and since I see these in high numbers I felt it was linked to their poor health later on | <a href="#">298348-298340-26546219</a> |
| Tra                                                                                                                                                              | <a href="#">298348-298340-26670536</a> |
| At times this can be a challenge and can take longer to attain acupuncture benefit                                                                               | <a href="#">298348-298340-26786544</a> |
| There's a difference between a predictor for bad response and a reason for a bad response                                                                        | <a href="#">298348-298340-26910831</a> |

## 10.10 Later abuse or trauma

### 10.10.a Later abuse or trauma - What you THINK NOW affects response

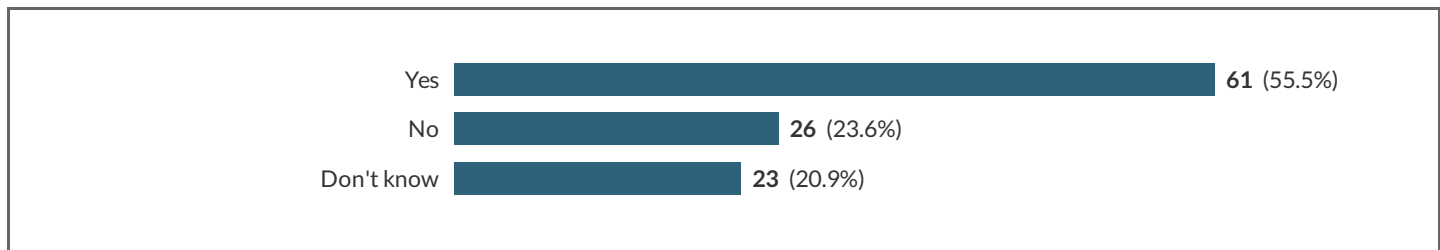

### 10.10.b Later abuse or trauma - What you THOUGHT THEN (in clinic) affected response

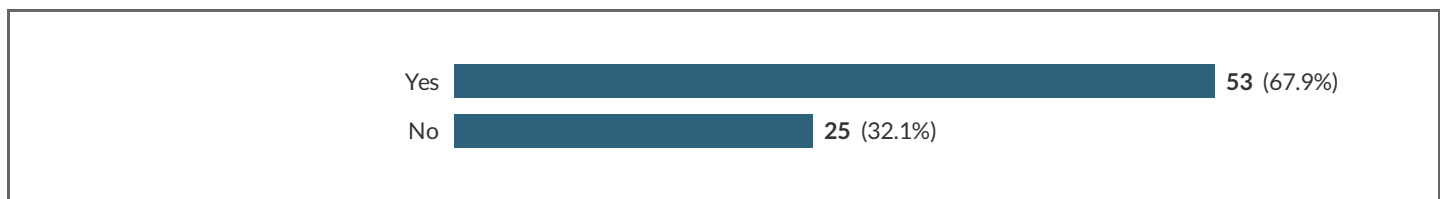

### 10.10.c Later abuse or trauma - Space for your comments

| Showing 5 of 10 responses                                                                                                                                        |                                        |
|------------------------------------------------------------------------------------------------------------------------------------------------------------------|----------------------------------------|
| Can impact the constitution and health but should not impact the response to the treatment.                                                                      | <a href="#">298348-298340-26107614</a> |
| As above                                                                                                                                                         | <a href="#">298348-298340-26546219</a> |
| Some situations partners control over the patient can affect outcome.                                                                                            | <a href="#">298348-298340-26670536</a> |
| all types of abuse and trauma, including PTSD have a huge effect on the patients ability to cope with pain/illness, as shown by my work in a Chronic Pain unit.. | <a href="#">298348-298340-27190466</a> |
| pretty obvious, plus see above                                                                                                                                   | <a href="#">298348-298340-26999243</a> |

## 10.11 Level of education

### 10.11.a Level of education - What you THINK NOW affects response

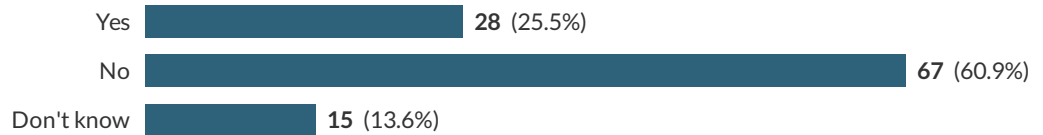

### 10.11.b Level of education - What you THOUGHT THEN (in clinic) affected response

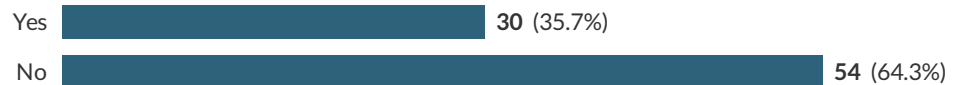

### 10.11.c Level of education - Space for your comments

| Showing 5 of 12 responses                                                                                                                                                                                                                                                                                                                                                      |                                        |
|--------------------------------------------------------------------------------------------------------------------------------------------------------------------------------------------------------------------------------------------------------------------------------------------------------------------------------------------------------------------------------|----------------------------------------|
| The acupuncturist should be able to explain the treatment to all levels of education. Negative perception of the treatment or confusion could lead to poor results.                                                                                                                                                                                                            | <a href="#">298348-298340-26107614</a> |
| Highly educated people are skeptical of traditional medicines and seem to be less appreciate of caring and kindness                                                                                                                                                                                                                                                            | <a href="#">298348-298340-26471554</a> |
| I believe education level can affect the ability to understand ourselves                                                                                                                                                                                                                                                                                                       | <a href="#">298348-298340-26924099</a> |
| again research shows that patients of low educational level are more likely to suffer chronic pain and other illnesses. some respond well but some are unable to understand the deeper influences on their physical + mental health and continue to seek an answer in medications or other treatment like that, even when all treatments they have had up to now have failed.. | <a href="#">298348-298340-27190466</a> |
| Stephen Hawkins is well educated, does that mean he responds to acupuncture better?                                                                                                                                                                                                                                                                                            | <a href="#">298348-298340-26999243</a> |

## 10.12 Relationship/marital status

### 10.12.a Relationship/marital status - What you THINK NOW affects response

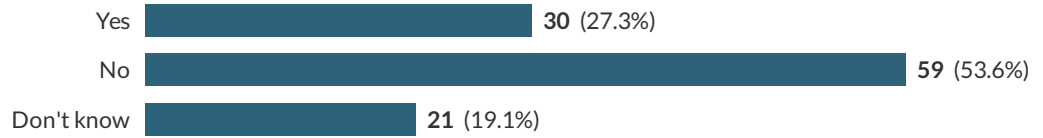

#### 10.12.b Relationship/marital status - What you THOUGHT THEN (in clinic) affected response

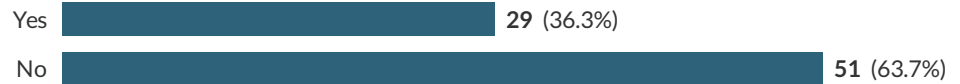

#### 10.12.c Relationship/marital status - Space for your comments

| Showing 5 of 6 responses                                                                                                             |                                        |
|--------------------------------------------------------------------------------------------------------------------------------------|----------------------------------------|
| Can impact the emotions and health but should not impact the response to the treatment.                                              | <a href="#">298348-298340-26107614</a> |
| It's not the actual status but how they are coping with any changes                                                                  | <a href="#">298348-298340-27190466</a> |
| if you are in a bad relationship, this affects your qi and how you respond to acupuncture, marital status is a quite different issue | <a href="#">298348-298340-26999243</a> |
| Happiness and stress level                                                                                                           | <a href="#">298348-298340-29691597</a> |
| Generally, people in happy relationships respond better to treatments.                                                               | <a href="#">298348-298340-30079001</a> |

#### 10.13 Social network and/or support

##### 10.13.a Social network and/or support - What you THINK NOW affects response

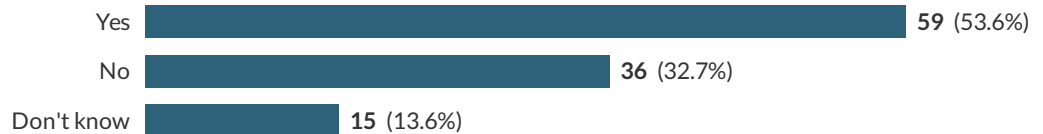

##### 10.13.b Social network and/or support - What you THOUGHT THEN (in clinic) affected response



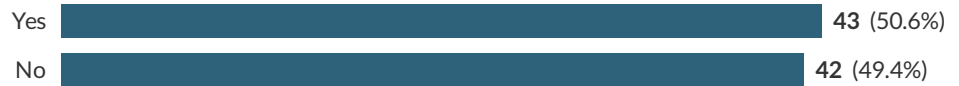

#### 10.13.c Social network and/or support - Space for your comments

| Showing 5 of 10 responses                                                                                                                                                                                                                               |                                        |
|---------------------------------------------------------------------------------------------------------------------------------------------------------------------------------------------------------------------------------------------------------|----------------------------------------|
| From experience patients who have poor social circles cope less well in general life which can then impact on their health                                                                                                                              | <a href="#">298348-298340-26546219</a> |
| Example of problems of smoking, drug, gambling and alcohol addiction.                                                                                                                                                                                   | <a href="#">298348-298340-26670536</a> |
| People with a strong support around them tend to fare better                                                                                                                                                                                            | <a href="#">298348-298340-26924099</a> |
| research supports that this is a factor in people's ability to cope with any health problems and helps their mental health and experience with patients backs this up. chronic pain patients often have poor support systems from family and generally. | <a href="#">298348-298340-27190466</a> |
| enhances likely good response                                                                                                                                                                                                                           | <a href="#">298348-298340-27904971</a> |

#### 10.14 Housing situation

##### 10.14.a Housing situation - What you THINK NOW affects response

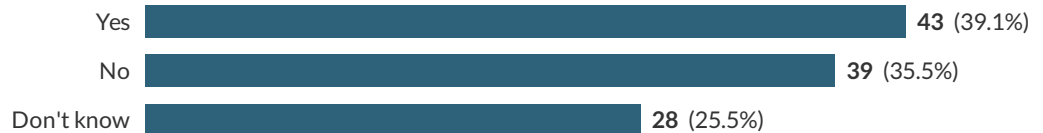

##### 10.14.b Housing situation - What you THOUGHT THEN (in clinic) affected response

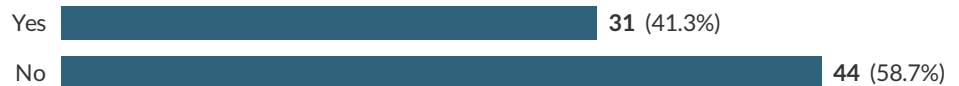

##### 10.14.c Housing situation - Space for your comments

| Showing 5 of 8 responses                                                                                                                                                                                              |                                        |
|-----------------------------------------------------------------------------------------------------------------------------------------------------------------------------------------------------------------------|----------------------------------------|
| Can impact the constitution and health but should not impact the response to the treatment.                                                                                                                           | <a href="#">298348-298340-26107614</a> |
| It is not unusual to find th patients main problem is poor conditions. e.g. Serious Damp issues in the home.                                                                                                          | <a href="#">298348-298340-26670536</a> |
| this can be a huge stress, either the quality of the accommodation, the neighbours, or physically unable to cope with issues like stairs.                                                                             | <a href="#">298348-298340-27190466</a> |
| but only if they affect the state of the persons qi                                                                                                                                                                   | <a href="#">298348-298340-26999243</a> |
| People with a difficult or uncertain housing situation seem to find it hard to find stability which has an impact on all areas of their life and health. I notice this particularly with younger people and students. | <a href="#">298348-298340-29161230</a> |

## 10.15 Work situation

### 10.15.a Work situation - What you THINK NOW affects response

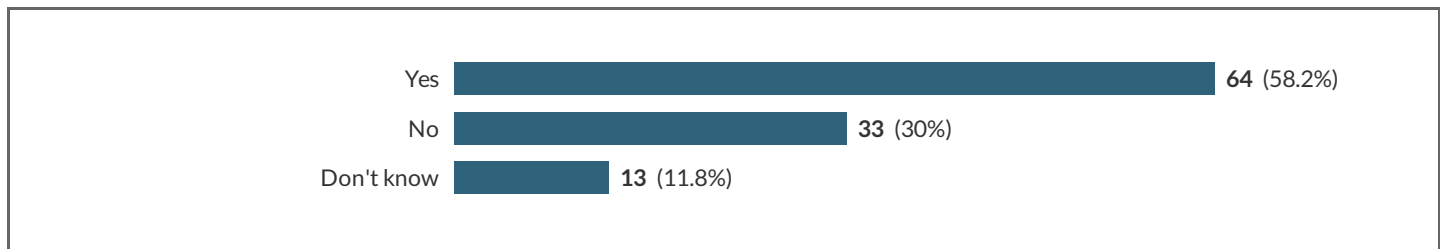

### 10.15.b Work situation - What you THOUGHT THEN (in clinic) affected response

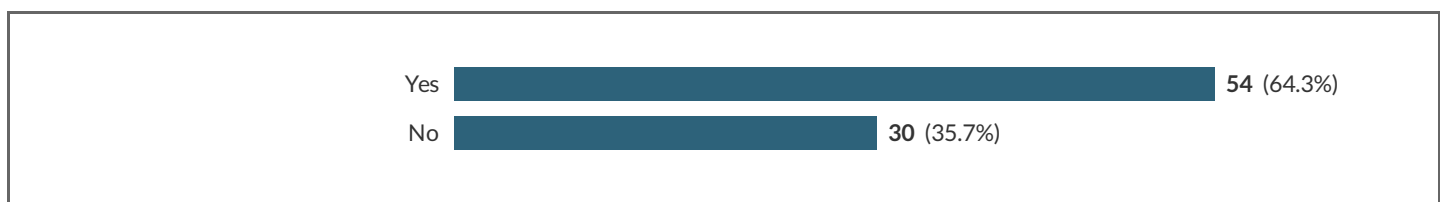

### 10.15.c Work situation - Space for your comments

| Showing 5 of 13 responses                                                                             |                                        |
|-------------------------------------------------------------------------------------------------------|----------------------------------------|
| Can impact the constitution and health but should not impact the response to the treatment.           | <a href="#">298348-298340-26107614</a> |
| It affects their resources - both financially and time available for treatment/life changes.          | <a href="#">298348-298340-26489299</a> |
| I have treated a number of patients whose stressful jobs seem to have contributed to their ill health | <a href="#">298348-298340-26546219</a> |
| Inability to improve conditions of overwork and stress if it is cause of the main complaint.          | <a href="#">298348-298340-26670536</a> |
| Uncertainty over work income affects stress levels and treatment outcomes                             | <a href="#">298348-298340-26924099</a> |

## 10.16 Financial situation

### 10.16.a Financial situation - What you THINK NOW affects response

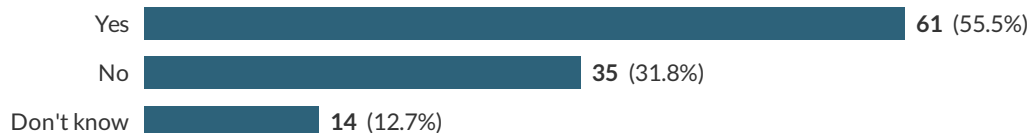

### 10.16.b Financial situation - What you THOUGHT THEN (in clinic) affected response

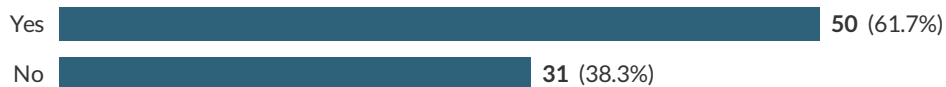

### 10.16.c Financial situation - Space for your comments

#### Showing 5 of 12 responses

|                                                                                                                                                                                                                                                                                          |                                        |
|------------------------------------------------------------------------------------------------------------------------------------------------------------------------------------------------------------------------------------------------------------------------------------------|----------------------------------------|
| Can impact the constitution and health but should not impact the response to the treatment.                                                                                                                                                                                              | <a href="#">298348-298340-26107614</a> |
| Of course.                                                                                                                                                                                                                                                                               | <a href="#">298348-298340-26489299</a> |
| Can't afford treatment. Different issue?                                                                                                                                                                                                                                                 | <a href="#">298348-298340-26910831</a> |
| Affects ability to continue treatment after initial relief (usually stop too soon)                                                                                                                                                                                                       | <a href="#">298348-298340-26924099</a> |
| people are often working more than 1 job or long hours to earn enough to support their family, so again physical and mental stress. also benefits and litigation often hidden factors that affect people's progress - either the stress of going through the process or secondary gains. | <a href="#">298348-298340-27190466</a> |

## 10.17 Religious beliefs or practices

### 10.17.a Religious beliefs or practices - What you THINK NOW affects response

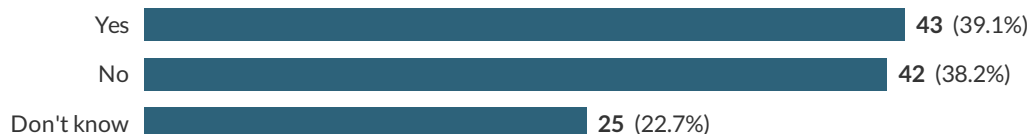

10.17.b Religious beliefs or practices - What you THOUGHT THEN (in clinic) affected response

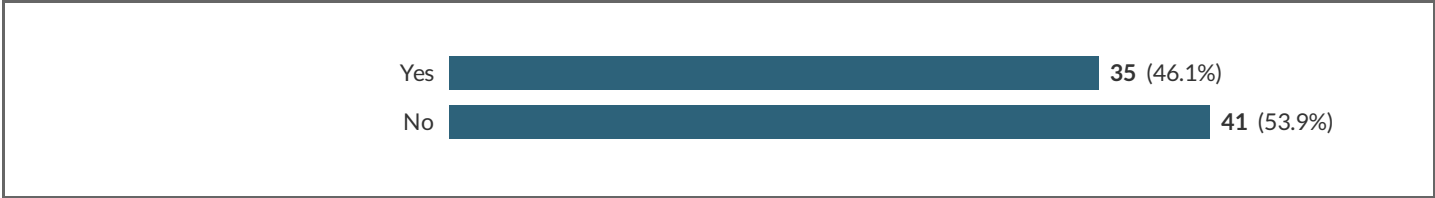

10.17.c Religious beliefs or practices - Space for your comments

| Showing 5 of 10 responses                                                                                                                                              |                                        |
|------------------------------------------------------------------------------------------------------------------------------------------------------------------------|----------------------------------------|
| Unless leading to negative perception of the treatment which could lead to poor results.                                                                               | <a href="#">298348-298340-26107614</a> |
| I think this is more likely to affect patient's decision to attend in the first place.                                                                                 | <a href="#">298348-298340-26489299</a> |
| Faith affects everything                                                                                                                                               | <a href="#">298348-298340-26910831</a> |
| have had people who say that they area concerned about the negative influence acupuncture could potentially have, usually Christians rather than other belief systems. | <a href="#">298348-298340-27190466</a> |
| may reduce response                                                                                                                                                    | <a href="#">298348-298340-27904971</a> |

10.18 Attitude to nature &/or technology

10.18.a Attitude to nature &/or technology - What you THINK NOW affects response

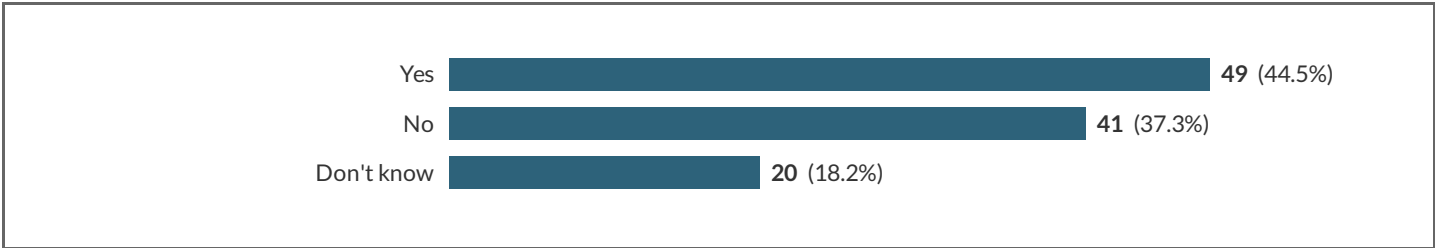

10.18.b Attitude to nature &/or technology - What you THOUGHT THEN (in clinic) affected response

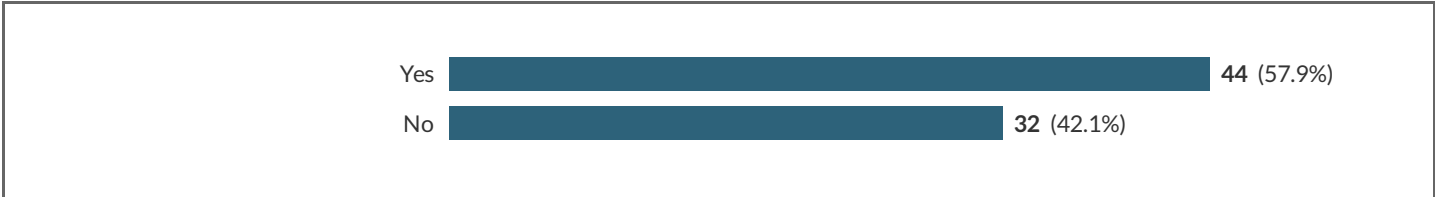

10.18.c Attitude to nature &/or technology - Space for your comments

| Showing 5 of 10 responses                                                                                                                                                                                          |                                        |
|--------------------------------------------------------------------------------------------------------------------------------------------------------------------------------------------------------------------|----------------------------------------|
| Working with nature is essential                                                                                                                                                                                   | <a href="#">298348-298340-26910831</a> |
| how well (or poorly) they respond to acupuncture is obviously a factor in the context of them understanding nature as a dynamic state of qi. What that has to do with their attitude to technology, I am not sure. | <a href="#">298348-298340-26999243</a> |
| may enhance response                                                                                                                                                                                               | <a href="#">298348-298340-27904971</a> |
| A patient's attitude to nature (where it reflects Chinese medicine philosophy) seems to positively affect treatment outcome                                                                                        | <a href="#">298348-298340-28721109</a> |
| People who are more linked to nature are more open to acupuncture. Also preferring Natural Medicine and being willing to consider lifestyle changes.                                                               | <a href="#">298348-298340-29037670</a> |

## 10.19 General state of health

### 10.19.a General state of health - What you THINK NOW affects response

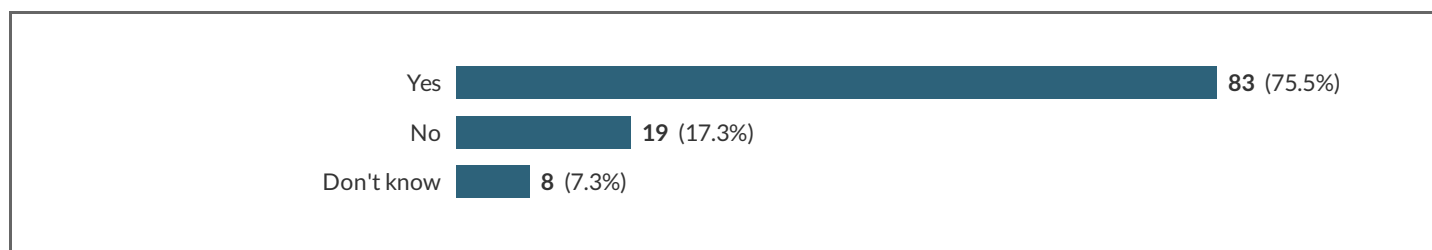

### 10.19.b General state of health - What you THOUGHT THEN (in clinic) affected response

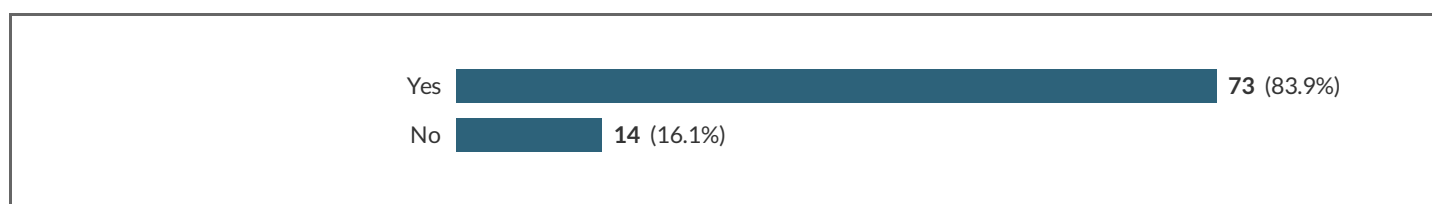

### 10.19.c General state of health - Space for your comments

| Showing 5 of 13 responses                                                                                                                                                       |                                        |
|---------------------------------------------------------------------------------------------------------------------------------------------------------------------------------|----------------------------------------|
| Unless patient has severely damaged their Jing, acupuncture might not be the best method as could be draining, it would also take a lot of sessions to see significant results. | <a href="#">298348-298340-26107614</a> |
| Difficult to separate this from presenting symptom(s)                                                                                                                           | <a href="#">298348-298340-26488000</a> |
| It is likely to take several sessions to fully understand the state of health of the patient - so in clinic you deal with what you know initially.                              | <a href="#">298348-298340-26489299</a> |
| Similar to first question's answer if very elderly and in extremely poor state of health.                                                                                       | <a href="#">298348-298340-26670536</a> |
| if people aren't making the choices in their lifestyle that supports good health then it is much harder for any treatment to have a sustained effect                            | <a href="#">298348-298340-27190466</a> |

## 10.20 Neurochemical or hormonal levels\* (e.g. ease of neurotransmitter 'expression')

### 10.20.a Neurochemical or hormonal levels\* (e.g. ease of neurotransmitter 'expression') - What you THINK NOW affects response

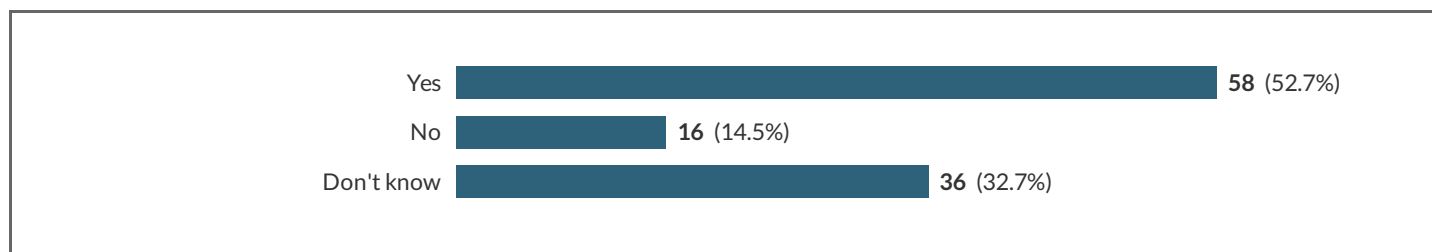

### 10.20.b Neurochemical or hormonal levels\* (e.g. ease of neurotransmitter 'expression') - What you THOUGHT THEN (in clinic) affected response

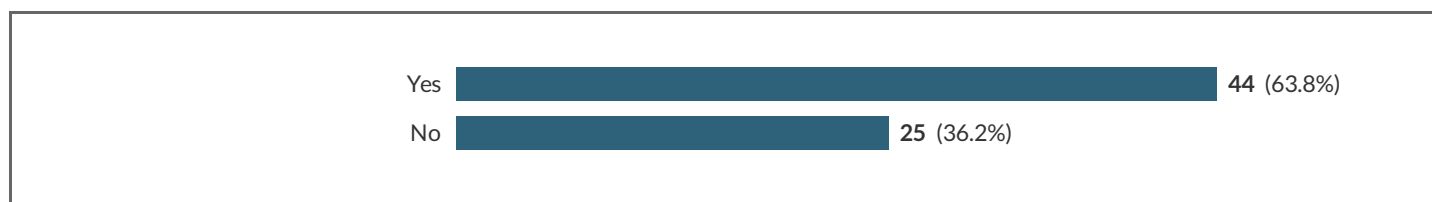

### 10.20.c Neurochemical or hormonal levels\* (e.g. ease of neurotransmitter 'expression') - Space for your comments

| Showing 5 of 12 responses                                                                                                                                              |                                        |
|------------------------------------------------------------------------------------------------------------------------------------------------------------------------|----------------------------------------|
| Not in my experience as have seen a case of patient with punctured spinal cord responding well to acupuncture and regaining sensitivity. It is a long process however. | <a href="#">298348-298340-26107614</a> |
| Don't understand this                                                                                                                                                  | <a href="#">298348-298340-26488000</a> |
| I'm doing an MSc in pain management so have learnt a lot about this recently                                                                                           | <a href="#">298348-298340-26546219</a> |
| obviously                                                                                                                                                              | <a href="#">298348-298340-26999243</a> |
| Some patients have stronger reactions, it could be linked to this.                                                                                                     | <a href="#">298348-298340-29037670</a> |

## 10.21 Central sensitisation\*

### 10.21.a Central sensitisation\* - What you THINK NOW affects response

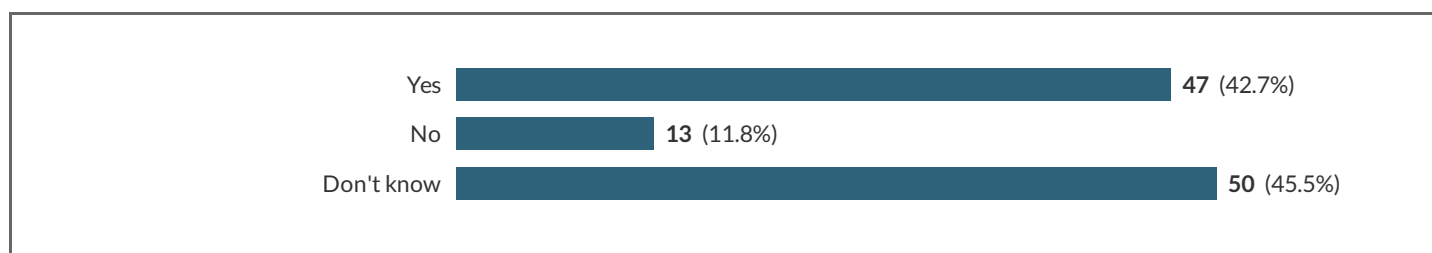

### 10.21.b Central sensitisation\* - What you THOUGHT THEN (in clinic) affected response

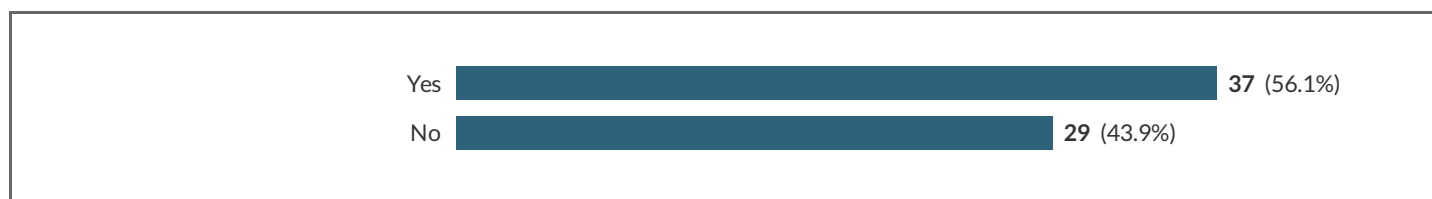

### 10.21.c Central sensitisation\* - Space for your comments

| Showing 5 of 11 responses                                                 |                                        |
|---------------------------------------------------------------------------|----------------------------------------|
| Fibromyalgia patients respond well to acupuncture, especially SiYuan BMA. | <a href="#">298348-298340-26107614</a> |
| As above                                                                  | <a href="#">298348-298340-26546219</a> |
| what is this? If this is sensitisation then no                            | <a href="#">298348-298340-26670536</a> |
| If I understand, this affects the ability to receive needles              | <a href="#">298348-298340-26910831</a> |
| Don't know                                                                | <a href="#">298348-298340-26948161</a> |

## 10.a Space for any additional comments you may wish to make:

| Showing 5 of 12 responses                                                                                                                                                                                                                                                                                                                                                                                                                                                                                             |                                        |
|-----------------------------------------------------------------------------------------------------------------------------------------------------------------------------------------------------------------------------------------------------------------------------------------------------------------------------------------------------------------------------------------------------------------------------------------------------------------------------------------------------------------------|----------------------------------------|
| Some questions are difficult to answer as patients may not be honest about their responses as they wish to please - or be difficult.                                                                                                                                                                                                                                                                                                                                                                                  | <a href="#">298348-298340-26489299</a> |
| I did a lecture on this to the local BAcC group. I explained the effects on the nervous system, Flag system, special questions to ask about mood, sleep, differential diagnosis of MSK problems, identifying trigger points, Hypermobility(a significant percentage of our younger patients are undiagnosed Hypermobile people which often explains a lot of their health problems), Pain Management principles, Acceptance + Commitment therapy + Mindfulness, as well as acupuncture approaches that may be useful. | <a href="#">298348-298340-27190466</a> |
| Feel that there should have been a box for possibly.                                                                                                                                                                                                                                                                                                                                                                                                                                                                  | <a href="#">298348-298340-27443875</a> |
| neurotransmitter 'expression' and central sensitisation are important factors regarding the response to acupuncture, but please don't reduce it to just that                                                                                                                                                                                                                                                                                                                                                          | <a href="#">298348-298340-26999243</a> |
| I do an audit of all my acupuncture patients annually, covering basic patient characteristics. hence age gender ethnicity repos based on this                                                                                                                                                                                                                                                                                                                                                                         | <a href="#">298348-298340-27654180</a> |

**11** Particular patient characteristics, attitudes or experience that you think may contribute to how well (or poorly) they respond to acupuncture. (Information on those that are asterisked can be found under 'More Info', above.)

### 11.1 Diet and nutritional status

#### 11.1.a Diet and nutritional status - What you THINK NOW affects response

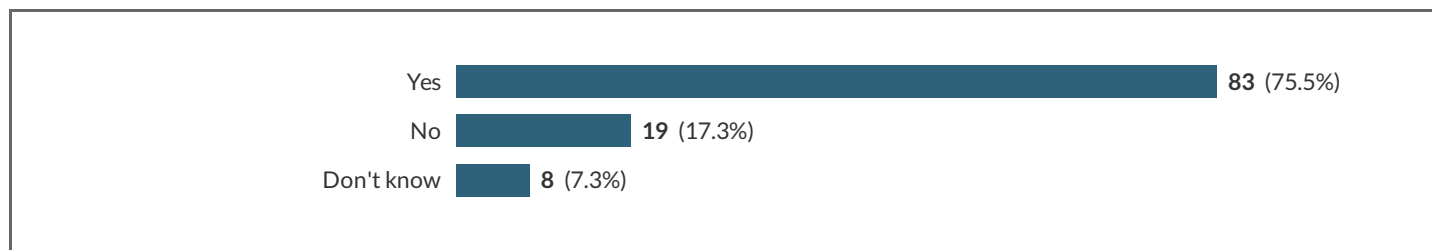

#### 11.1.b Diet and nutritional status - What you THOUGHT THEN (in clinic) affected response

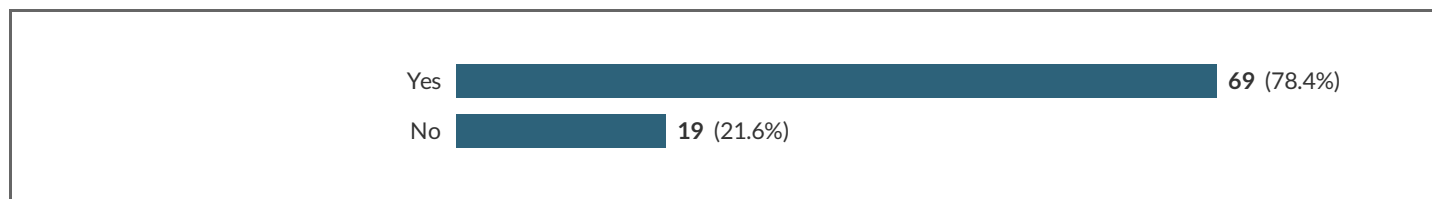

#### 11.1.c Diet and nutritional status - Space for your comments



| Showing 5 of 14 responses                                                                                                                                                                                                                                                                                                                    |                        |
|----------------------------------------------------------------------------------------------------------------------------------------------------------------------------------------------------------------------------------------------------------------------------------------------------------------------------------------------|------------------------|
| This can have an impact on health or constitution.                                                                                                                                                                                                                                                                                           | 298348-298340-26107614 |
| Need blood to receive treatment                                                                                                                                                                                                                                                                                                              | 298348-298340-26910831 |
| Blood deficiency                                                                                                                                                                                                                                                                                                                             | 298348-298340-26951369 |
| if the person is not giving their body what it needs to build and repair, their nervous system and local tissues will not have the resources needed to improve. also there are often mental/emotional aspects to this issue that may be difficult to change.                                                                                 | 298348-298340-27190466 |
| all actions (external, internal, emotional, etc.) that affect the state of our qi, blood, jing, shen, etc. will have an effect on how we function, both in the language of CM or that of biomedical science, which you seem to favour. The more balanced we are, the more favourably we will respond to acupuncture treatment in my opinion. | 298348-298340-26999243 |

## 11.2 Exercise taken

### 11.2.a Exercise taken - What you THINK NOW affects response

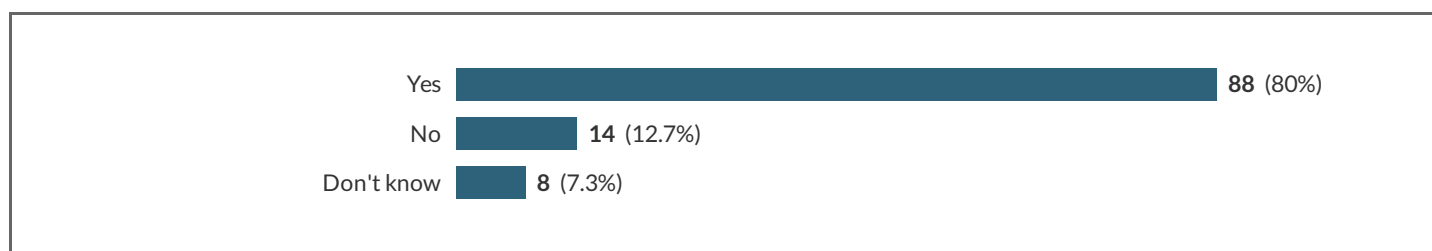

### 11.2.b Exercise taken - What you THOUGHT THEN (in clinic) affected response

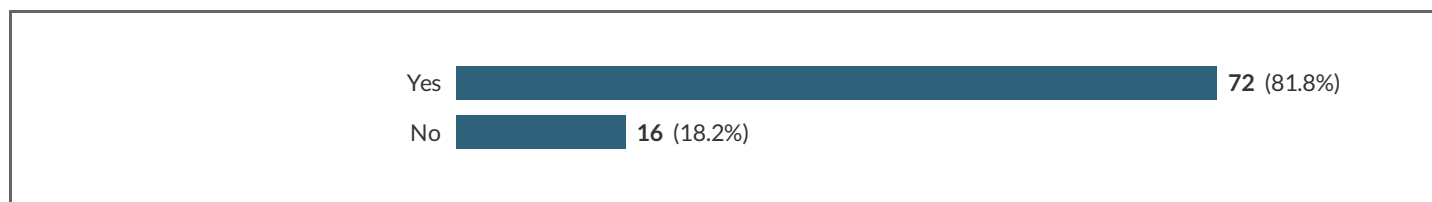

### 11.2.c Exercise taken - Space for your comments

| Showing 5 of 13 responses                                                                                                                                                                                                                                                                                    |                                        |
|--------------------------------------------------------------------------------------------------------------------------------------------------------------------------------------------------------------------------------------------------------------------------------------------------------------|----------------------------------------|
| Could marginally obtain better response as active people should have their Qi and Blood flowing more freely.                                                                                                                                                                                                 | <a href="#">298348-298340-26107614</a> |
| Exercise inappropriate to specific MSK condition will prevent improvement                                                                                                                                                                                                                                    | <a href="#">298348-298340-26951369</a> |
| the issue can be too much, too little or incorrect for their particaulr problem. unfortunately most acupuncturists are not equipped to properly assess this or give a suitable exercise programme. even less experienced physios miss things or take an unsuitable approach that I end up having to correct. | <a href="#">298348-298340-27190466</a> |
| see under diet and nutrition                                                                                                                                                                                                                                                                                 | <a href="#">298348-298340-26999243</a> |
| People/any trace of life it's stay alive cause of the movement                                                                                                                                                                                                                                               | <a href="#">298348-298340-27644723</a> |

### 11.3 Ability to relax

#### 11.3.a Ability to relax - What you THINK NOW affects response

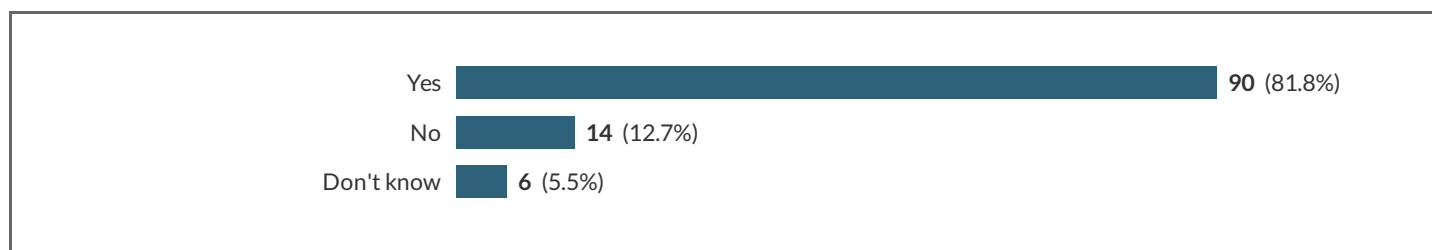

#### 11.3.b Ability to relax - What you THOUGHT THEN (in clinic) affected response

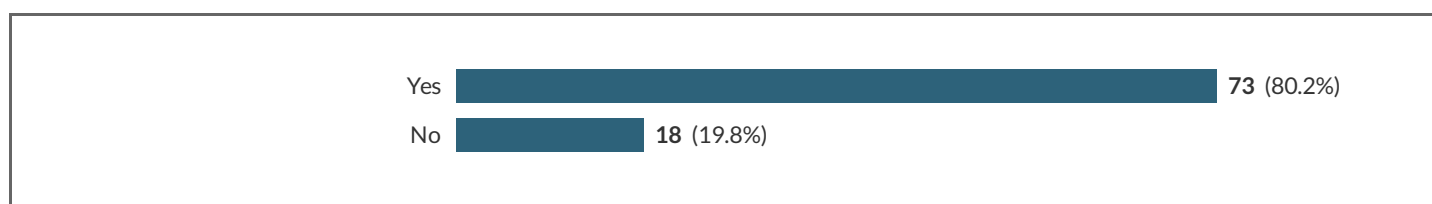

#### 11.3.c Ability to relax - Space for your comments

| Showing 5 of 13 responses                                                                                                                                                                                                                                                                                                                                                                                               |                                        |
|-------------------------------------------------------------------------------------------------------------------------------------------------------------------------------------------------------------------------------------------------------------------------------------------------------------------------------------------------------------------------------------------------------------------------|----------------------------------------|
| Ability to relax is tied in with the perception of the treatment.                                                                                                                                                                                                                                                                                                                                                       | <a href="#">298348-298340-26107614</a> |
| Alarm state in nervous system is a barrier                                                                                                                                                                                                                                                                                                                                                                              | <a href="#">298348-298340-26910831</a> |
| some people do gradually learn to relax as they listen to a tape during their treatment that talks them through a technique aimed at chronic pain patients. however with some mental health issues, letting go means that thoughts they are trying to suppress may come to the fore, which they don't like. as we are not a Mental Health unit, we would discuss this before considering some patients for acupuncture. | <a href="#">298348-298340-27190466</a> |
| see under diet and nutrition                                                                                                                                                                                                                                                                                                                                                                                            | <a href="#">298348-298340-26999243</a> |
| It's hard to do an accurate SLR most of the time because people don't know to control their muscle/relax                                                                                                                                                                                                                                                                                                                | <a href="#">298348-298340-27644723</a> |

#### 11.4 Overall satisfaction with life

##### 11.4.a Overall satisfaction with life - What you THINK NOW affects response

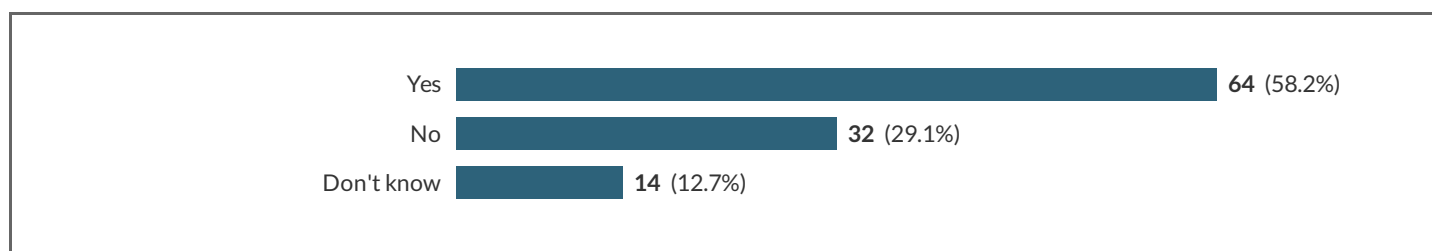

##### 11.4.b Overall satisfaction with life - What you THOUGHT THEN (in clinic) affected response

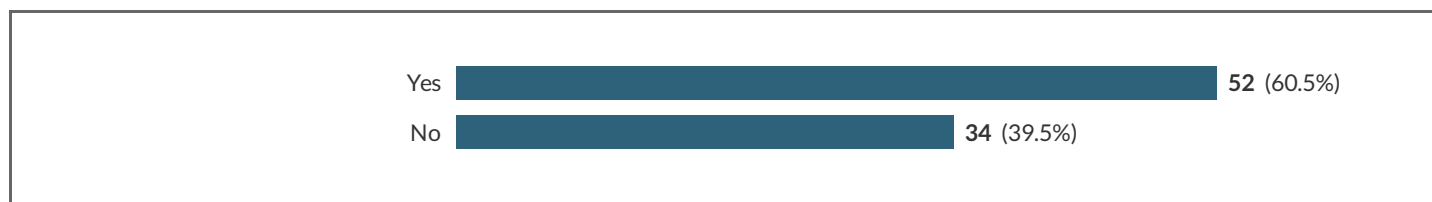

##### 11.4.c Overall satisfaction with life - Space for your comments

| Showing all 5 responses                                                                                                                                                                                           |                                        |
|-------------------------------------------------------------------------------------------------------------------------------------------------------------------------------------------------------------------|----------------------------------------|
| Dissatisfied (with their life) patient refusing to change their situation for the better will lose benefit of treatment quickly as emotions are an aggravating factor, will finally end up not responding at all. | <a href="#">298348-298340-26107614</a> |
| see under diet and nutrition                                                                                                                                                                                      | <a href="#">298348-298340-26999243</a> |
| depends if this is a symptom/ being treated                                                                                                                                                                       | <a href="#">298348-298340-29496506</a> |
| general mood of this patient was pessimistic and remained the same after acupuncture treatment.                                                                                                                   | <a href="#">298348-298340-29668534</a> |
| Yes, the positive attitude helps.                                                                                                                                                                                 | <a href="#">298348-298340-30079001</a> |

## 11.5 Feeling in control of life

### 11.5.a Feeling in control of life - What you THINK NOW affects response

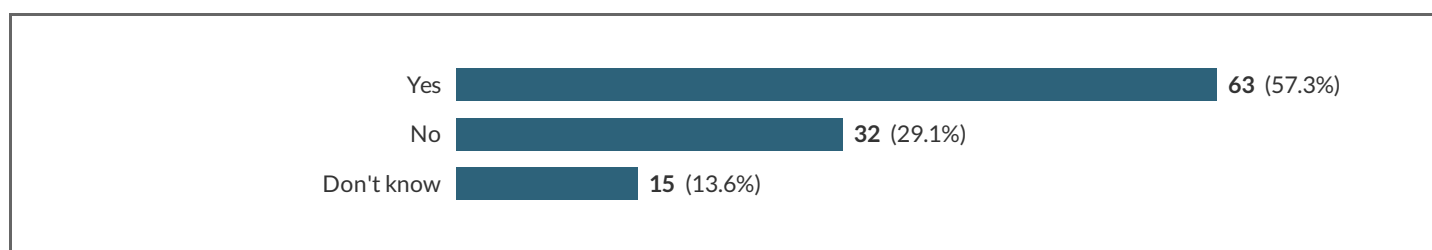

### 11.5.b Feeling in control of life - What you THOUGHT THEN (in clinic) affected response

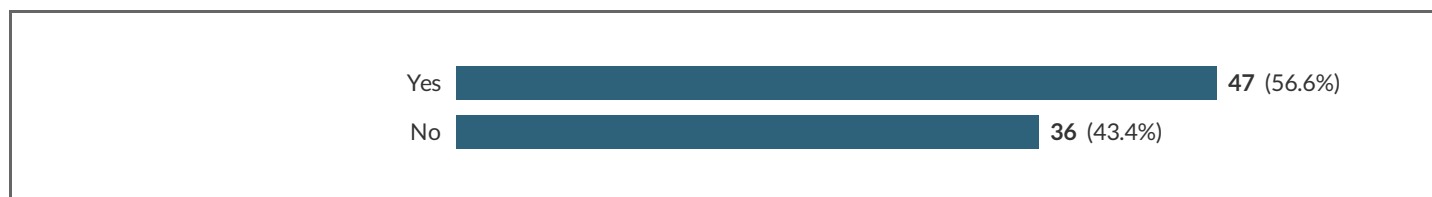

### 11.5.c Feeling in control of life - Space for your comments

| Showing 5 of 8 responses                                                                                                                                                                                                                                                                                                       |                                        |
|--------------------------------------------------------------------------------------------------------------------------------------------------------------------------------------------------------------------------------------------------------------------------------------------------------------------------------|----------------------------------------|
| Similar to above.                                                                                                                                                                                                                                                                                                              | <a href="#">298348-298340-26107614</a> |
| how many people in the whole population feel in control of all aspects of their life anyway?                                                                                                                                                                                                                                   | <a href="#">298348-298340-27190466</a> |
| Feeling in control of life, what exactly is that? For this life's destiny I follow the signs that I can detect, that is not the same as being in control of it. Am I in control of myself , the acupuncturist, the husband, the father, etc. Yes, that will affect my health via the 7 emotions and how I react to acupuncture | <a href="#">298348-298340-26999243</a> |
| depends if this is a symptom/ being treated                                                                                                                                                                                                                                                                                    | <a href="#">298348-298340-29496506</a> |
| Leads to positive attitude.                                                                                                                                                                                                                                                                                                    | <a href="#">298348-298340-29682718</a> |

## 11.6 Self-motivation

### 11.6.a Self-motivation - What you THINK NOW affects response

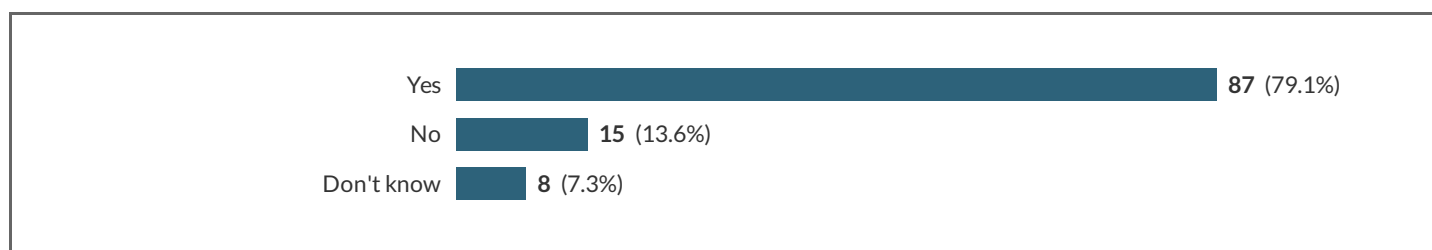

### 11.6.b Self-motivation - What you THOUGHT THEN (in clinic) affected response

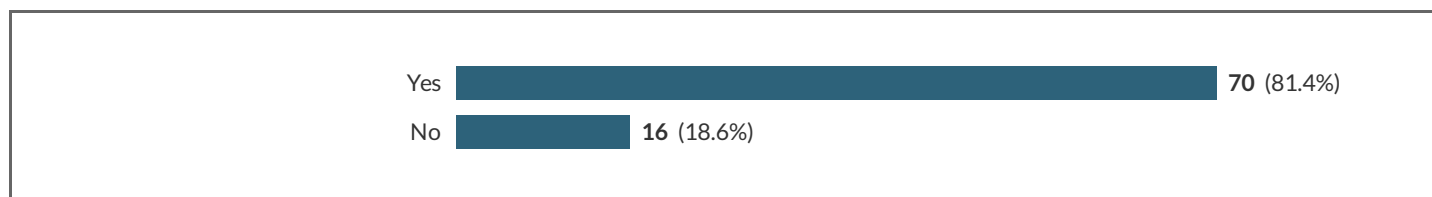

### 11.6.c Self-motivation - Space for your comments

| Showing 5 of 9 responses                                                                                                                                                                                                                                                                                                                                                                                                                                           |                                        |
|--------------------------------------------------------------------------------------------------------------------------------------------------------------------------------------------------------------------------------------------------------------------------------------------------------------------------------------------------------------------------------------------------------------------------------------------------------------------|----------------------------------------|
| Similar to above.                                                                                                                                                                                                                                                                                                                                                                                                                                                  | <a href="#">298348-298340-26107614</a> |
| Motivational interviewing can be very helpful in bringing out a persons readiness for change. as most people with chronic pain need to change something, this can be useful in sussing out who may be at the right stage to make the necessary changes. for some acupuncture may help get them to this stage, but for others mental/emotional/social factors may be a block. we would still try and work with some patient to see if we can overcome these blocks. | <a href="#">298348-298340-27190466</a> |
| see under diet and nutrition                                                                                                                                                                                                                                                                                                                                                                                                                                       | <a href="#">298348-298340-26999243</a> |
| Motivation to attend sessions.                                                                                                                                                                                                                                                                                                                                                                                                                                     | <a href="#">298348-298340-29037670</a> |
| depends if this is a symptom/ being treated                                                                                                                                                                                                                                                                                                                                                                                                                        | <a href="#">298348-298340-29496506</a> |

## 11.7 Sense of self-esteem

### 11.7.a Sense of self-esteem - What you THINK NOW affects response

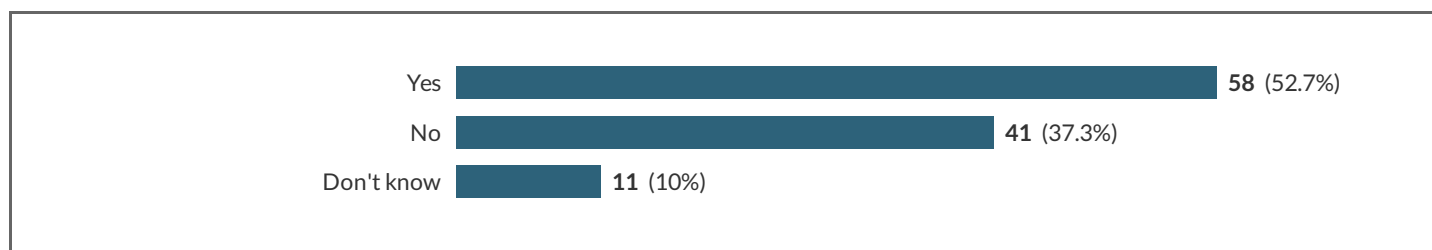

### 11.7.b Sense of self-esteem - What you THOUGHT THEN (in clinic) affected response

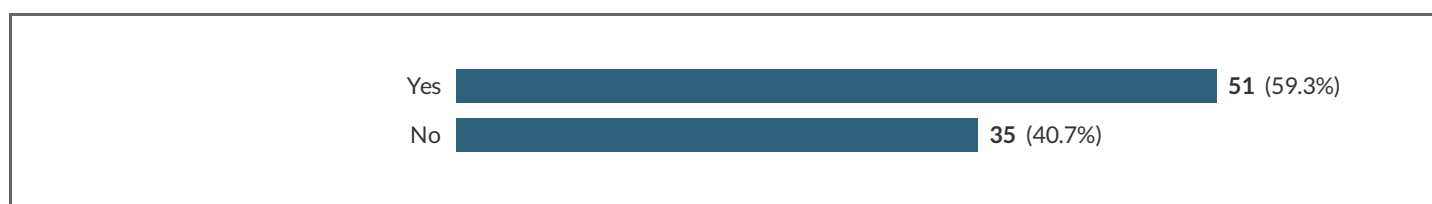

### 11.7.c Sense of self-esteem - Space for your comments

| Showing 5 of 7 responses                                                                                                                                                                                     |                                        |
|--------------------------------------------------------------------------------------------------------------------------------------------------------------------------------------------------------------|----------------------------------------|
| doesn't necessarily influence treatment but may affect their willingness/ability to change. often there are points of discussion that can help, but some may need further help from a Counsellor or similar. | <a href="#">298348-298340-27190466</a> |
| see under diet and nutrition                                                                                                                                                                                 | <a href="#">298348-298340-26999243</a> |
| depends if this is a symptom/ being treated                                                                                                                                                                  | <a href="#">298348-298340-29496506</a> |
| people I have found appear to be generally happier after acupuncture and feel very relaxed.                                                                                                                  | <a href="#">298348-298340-29668534</a> |
| As above                                                                                                                                                                                                     | <a href="#">298348-298340-29682718</a> |

## 11.8 Self-efficacy\*

### 11.8.a Self-efficacy\* - What you THINK NOW affects response

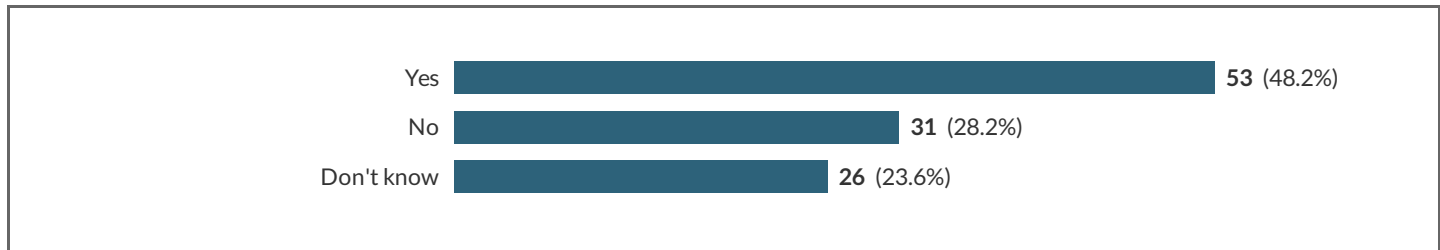

### 11.8.b Self-efficacy\* - What you THOUGHT THEN (in clinic) affected response

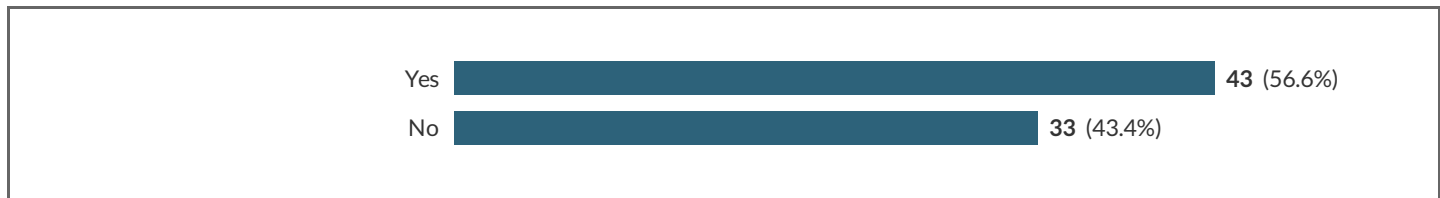

### 11.8.c Self-efficacy\* - Space for your comments

| Showing 5 of 6 responses                                                                                                                     |                                        |
|----------------------------------------------------------------------------------------------------------------------------------------------|----------------------------------------|
| what is this?                                                                                                                                | <a href="#">298348-298340-26488000</a> |
| again something that we often measure before and after in Chronic Pain Clinics as it is a well known predictor for tendency to chronic pain. | <a href="#">298348-298340-27190466</a> |
| see under diet and nutrition                                                                                                                 | <a href="#">298348-298340-26999243</a> |
| Some patients respond well who do not appear to have high self efficacy.                                                                     | <a href="#">298348-298340-29037670</a> |
| depends if this is a symptom/ being treated                                                                                                  | <a href="#">298348-298340-29496506</a> |

### 11.9 General sense of 'resilience'\*

#### 11.9.a General sense of 'resilience'\* - What you THINK NOW affects response

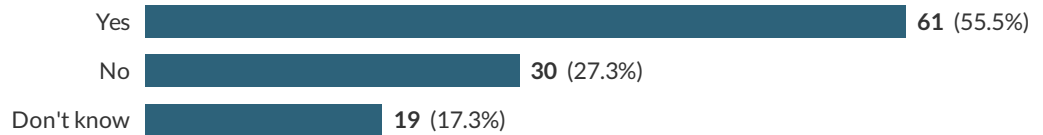

#### 11.9.b General sense of 'resilience'\* - What you THOUGHT THEN (in clinic) affected response

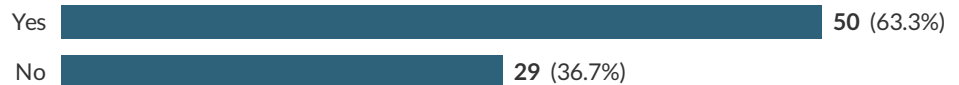

#### 11.9.c General sense of 'resilience'\* - Space for your comments

| Showing all 3 responses                                        |                                        |
|----------------------------------------------------------------|----------------------------------------|
| see under diet and nutrition                                   | <a href="#">298348-298340-26999243</a> |
| depends if this is a symptom/ being treated                    | <a href="#">298348-298340-29496506</a> |
| A positive trait that helps but does not impede the treatment. | <a href="#">298348-298340-30079001</a> |

### 11.10 Attachment style\* ('secure' or not)

#### 11.10.a Attachment style\* ('secure' or not) - What you THINK NOW affects response

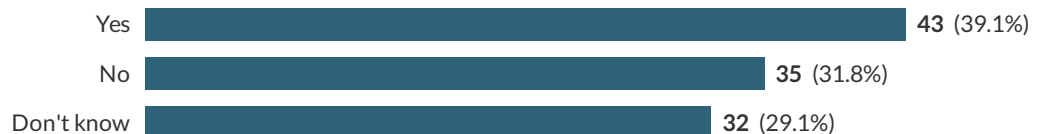

#### 11.10.b Attachment style\* ('secure' or not) - What you THOUGHT THEN (in clinic) affected response



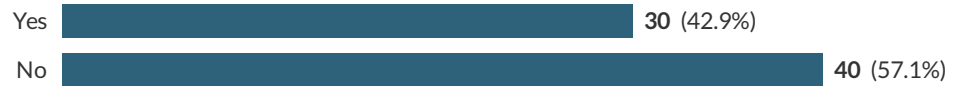

#### 11.10.c Attachment style\* ('secure' or not) - Space for your comments

| Showing all 4 responses                                                                                                                                                     |                                        |
|-----------------------------------------------------------------------------------------------------------------------------------------------------------------------------|----------------------------------------|
| not necessarily a factor in outcome but may be important in the therapeutic relationship.                                                                                   | <a href="#">298348-298340-27190466</a> |
| see under diet and nutrition                                                                                                                                                | <a href="#">298348-298340-26999243</a> |
| depends if this is a symptom/ being treated                                                                                                                                 | <a href="#">298348-298340-29496506</a> |
| Yes, may delay the response to treatment, for example people who are dependent emotionally on others. I would not distinguish any difference in the three attachment types. | <a href="#">298348-298340-30079001</a> |

#### 11.11 Issues with gender identity or sexual orientation

##### 11.11.a Issues with gender identity or sexual orientation - What you THINK NOW affects response

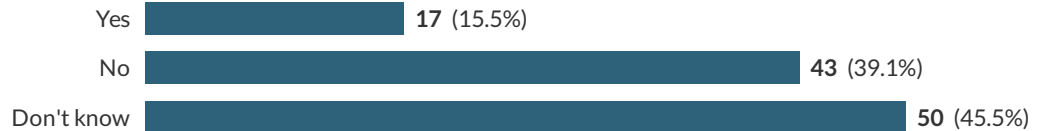

##### 11.11.b Issues with gender identity or sexual orientation - What you THOUGHT THEN (in clinic) affected response

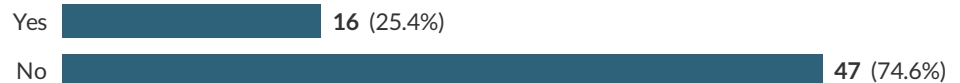

##### 11.11.c Issues with gender identity or sexual orientation - Space for your comments

| Showing 5 of 6 responses                                                                                                                                                      |                                        |
|-------------------------------------------------------------------------------------------------------------------------------------------------------------------------------|----------------------------------------|
| the patients we have seen in the Chronic Pain Clinic have had a lot of mental/emotional issues around this change, but then we don't get to see the ones who are coping well. | <a href="#">298348-298340-27190466</a> |
| as a heterosexual male, being happy with who I am, I am uncertain how to answer this question or why and how it would influence my reaction to acupuncture                    | <a href="#">298348-298340-26999243</a> |
| Haven't seen enough of these people to comment                                                                                                                                | <a href="#">298348-298340-29297475</a> |
| depends if this is a symptom/ being treated                                                                                                                                   | <a href="#">298348-298340-29496506</a> |
| Not enough experience to comment fairly                                                                                                                                       | <a href="#">298348-298340-29749243</a> |

## 11.12 Optimism

### 11.12.a Optimism - What you THINK NOW affects response

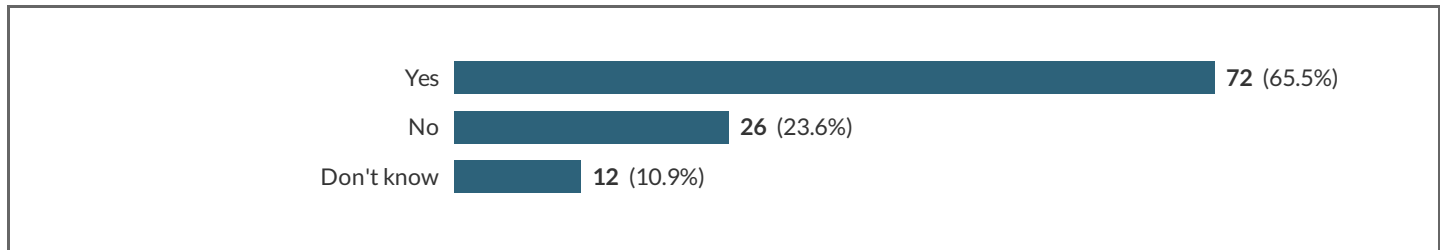

### 11.12.b Optimism - What you THOUGHT THEN (in clinic) affected response

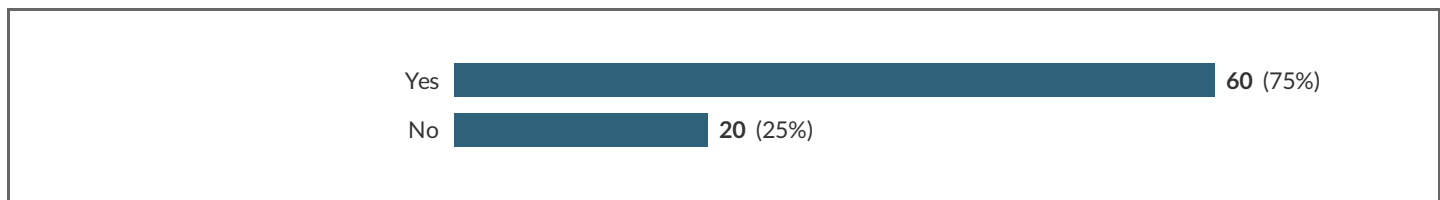

### 11.12.c Optimism - Space for your comments

| Showing 5 of 7 responses                                                                                                                                                                       |                                        |
|------------------------------------------------------------------------------------------------------------------------------------------------------------------------------------------------|----------------------------------------|
| Linked to treatment and post-treatment results perception. If patient believes nothing will change after the session, possibility that patient block flow of their Qi and are unable to relax. | <a href="#">298348-298340-26107614</a> |
| see under diet and nutrition                                                                                                                                                                   | <a href="#">298348-298340-26999243</a> |
| I think if the therapist is optimistic this helps the patient.                                                                                                                                 | <a href="#">298348-298340-29037670</a> |
| The patients general outlook.                                                                                                                                                                  | <a href="#">298348-298340-29668534</a> |
| Some people believe the treatment will help, and for them it often does.                                                                                                                       | <a href="#">298348-298340-29682718</a> |

### 11.13 Emotion or mood most often positive (or negative)

#### 11.13.a Emotion or mood most often positive (or negative) - What you THINK NOW affects response

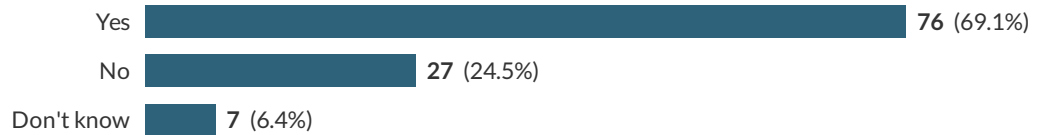

#### 11.13.b Emotion or mood most often positive (or negative) - What you THOUGHT THEN (in clinic) affected response

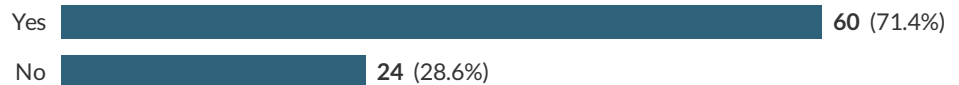

#### 11.13.c Emotion or mood most often positive (or negative) - Space for your comments

##### Showing 5 of 8 responses

|                                                                                                                                                                                                |                                        |
|------------------------------------------------------------------------------------------------------------------------------------------------------------------------------------------------|----------------------------------------|
| Linked to treatment and post-treatment results perception. If patient believes nothing will change after the session, possibility that patient block flow of their Qi and are unable to relax. | <a href="#">298348-298340-26107614</a> |
| none of the chronic pain patients would have treatment if this was true.                                                                                                                       | <a href="#">298348-298340-27190466</a> |
| see under diet and nutrition                                                                                                                                                                   | <a href="#">298348-298340-26999243</a> |
| Emotion varies for each patient & each session.                                                                                                                                                | <a href="#">298348-298340-29037670</a> |
| Positive people seem to look for improvements, while other people don't seem to see them.                                                                                                      | <a href="#">298348-298340-29228864</a> |

### 11.14 Emotional instability

#### 11.14.a Emotional instability - What you THINK NOW affects response

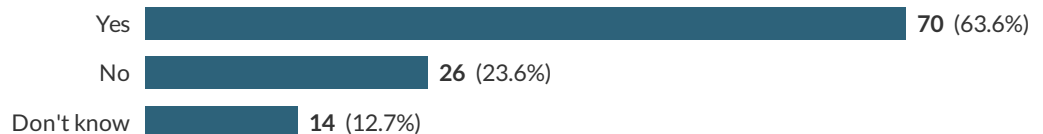

11.14.b Emotional instability - What you THOUGHT THEN (in clinic) affected response

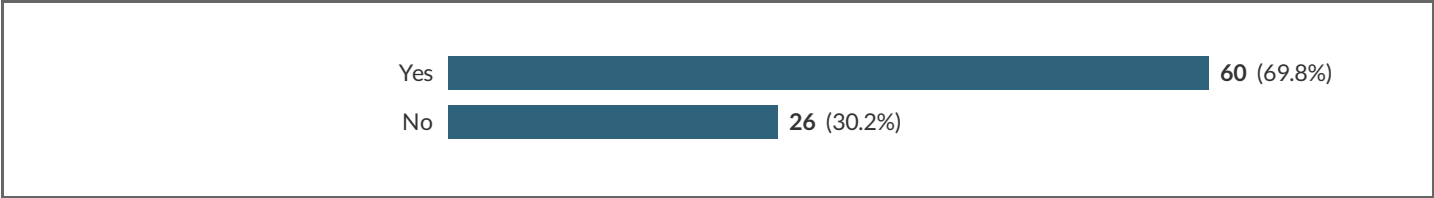

11.14.c Emotional instability - Space for your comments

| Showing 5 of 7 responses                                                                                                                                           |                                        |
|--------------------------------------------------------------------------------------------------------------------------------------------------------------------|----------------------------------------|
| again it's down to degrees. patients with a mental health disorder may not be able or willing to make any changes or be able to relax enough during the treatment. | <a href="#">298348-298340-27190466</a> |
| see under diet and nutrition                                                                                                                                       | <a href="#">298348-298340-26999243</a> |
| Sometimes unstable people have trouble committing to treatment and stop too soon.                                                                                  | <a href="#">298348-298340-29228864</a> |
| depends if this is a symptom/ being treated                                                                                                                        | <a href="#">298348-298340-29496506</a> |
| Yes, it is like the wind and changes so can delay the response to treatment.                                                                                       | <a href="#">298348-298340-30079001</a> |

11.15 Self-regulation\*

11.15.a Self-regulation\* - What you THINK NOW affects response

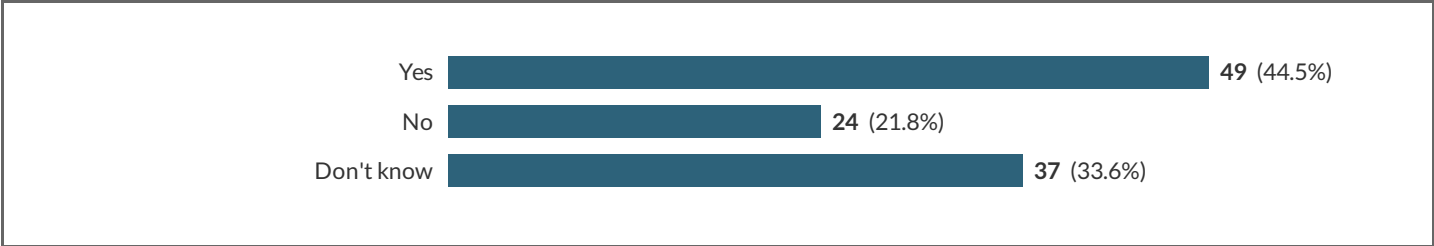

11.15.b Self-regulation\* - What you THOUGHT THEN (in clinic) affected response

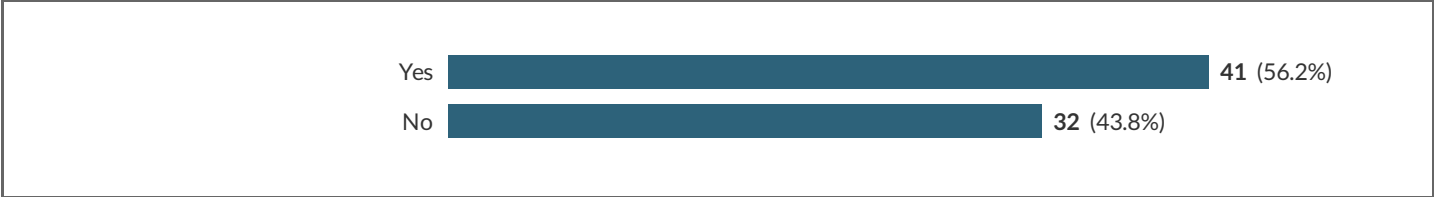

11.15.c Self-regulation\* - Space for your comments

| Showing all 3 responses                                            |                                        |
|--------------------------------------------------------------------|----------------------------------------|
| see under diet and nutrition                                       | <a href="#">298348-298340-26999243</a> |
| Difficult to say, it depends if balanced.                          | <a href="#">298348-298340-30079001</a> |
| Some people don't have this, it can make treatment outcomes slower | <a href="#">298348-298340-30475628</a> |

## 11.16 Sensitivity to stress

### 11.16.a Sensitivity to stress - What you THINK NOW affects response

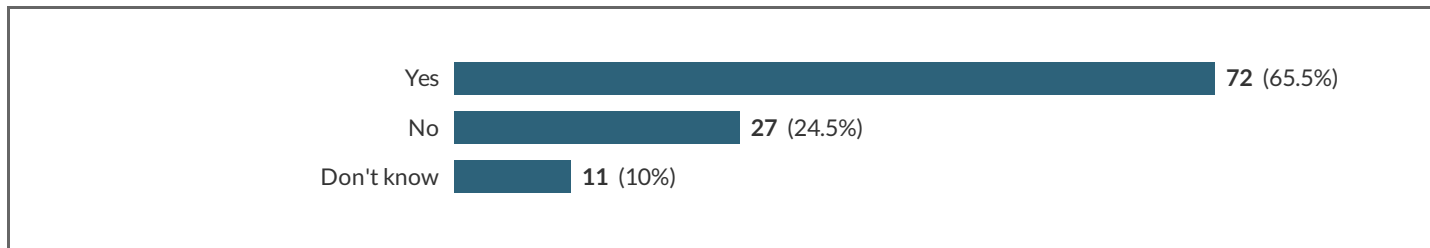

### 11.16.b Sensitivity to stress - What you THOUGHT THEN (in clinic) affected response

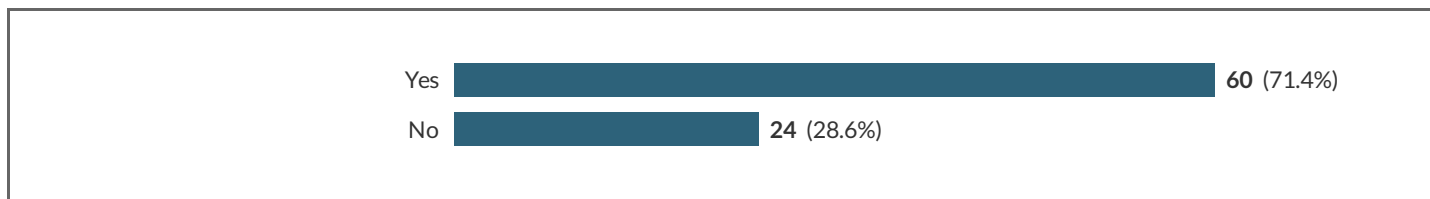

### 11.16.c Sensitivity to stress - Space for your comments

| Showing all 4 responses                                                           |                                        |
|-----------------------------------------------------------------------------------|----------------------------------------|
| see under diet and nutrition                                                      | <a href="#">298348-298340-26999243</a> |
| depends if this is a symptom/ being treated                                       | <a href="#">298348-298340-29496506</a> |
| Immediate relief usual for these clients                                          | <a href="#">298348-298340-29668534</a> |
| Difficult to say, we are all sensitive but it depends on how we deal with stress. | <a href="#">298348-298340-30079001</a> |

## 11.17 Frequently or generally anxious

### 11.17.a Frequently or generally anxious - What you THINK NOW affects response

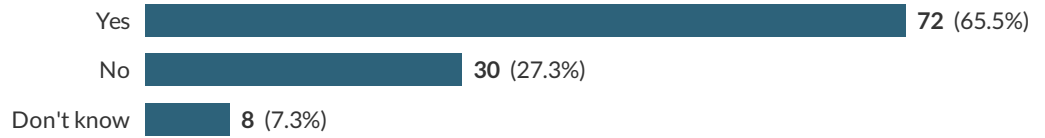

#### 11.17.b Frequently or generally anxious - What you THOUGHT THEN (in clinic) affected response

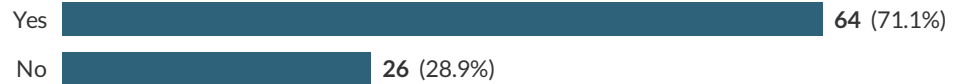

#### 11.17.c Frequently or generally anxious - Space for your comments

| Showing 5 of 8 responses                                                                                                     |                                        |
|------------------------------------------------------------------------------------------------------------------------------|----------------------------------------|
| someone with a proper anxiety disorder may be more difficult to help in the long term.                                       | <a href="#">298348-298340-27190466</a> |
| see under diet and nutrition                                                                                                 | <a href="#">298348-298340-26999243</a> |
| I think acupuncture can greatly help anxiety and if patients understand it will need a few treatments they will see results. | <a href="#">298348-298340-29037670</a> |
| depends if this is a symptom/ being treated                                                                                  | <a href="#">298348-298340-29496506</a> |
| Helps with anxiety sometimes results are realised a few hours after the treatment.                                           | <a href="#">298348-298340-29668534</a> |

#### 11.18 Depressive

#### 11.18.a Depressive - What you THINK NOW affects response

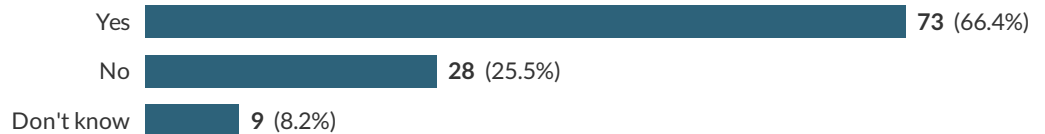

#### 11.18.b Depressive - What you THOUGHT THEN (in clinic) affected response

Yes  59 (68.6%)

No  27 (31.4%)

### 11.18.c Depressive - Space for your comments

| Showing 5 of 10 responses                                                                                           |                                        |
|---------------------------------------------------------------------------------------------------------------------|----------------------------------------|
| Depends on degree                                                                                                   | <a href="#">298348-298340-26488000</a> |
| Depends on the cause of depression. If the patient has serious psychosis e.g. bipolar it can be difficult to treat. | <a href="#">298348-298340-26670536</a> |
| have had people with bipolar disorder on treatment, once there stable on their meds.                                | <a href="#">298348-298340-27190466</a> |
| see under diet and nutrition                                                                                        | <a href="#">298348-298340-26999243</a> |
| I have patients who have had really good results with depressive symptoms.                                          | <a href="#">298348-298340-29037670</a> |

### 11.19 Psychotic

#### 11.19.a Psychotic - What you THINK NOW affects response

Yes  55 (50%)

No  15 (13.6%)

Don't know  40 (36.4%)

#### 11.19.b Psychotic - What you THOUGHT THEN (in clinic) affected response

Yes  43 (67.2%)

No  21 (32.8%)

#### 11.19.c Psychotic - Space for your comments

| Showing 5 of 12 responses                                                                                              |                                        |
|------------------------------------------------------------------------------------------------------------------------|----------------------------------------|
| Generally unsuitable in psychosis                                                                                      | <a href="#">298348-298340-26488000</a> |
| In serious cases of psychosis it can be very difficult to treat with acupuncture.                                      | <a href="#">298348-298340-26670536</a> |
| Not stable enough for treatment                                                                                        | <a href="#">298348-298340-26910831</a> |
| Very little experience here and tend to guide very serious mental health to other professionals as I practice alone    | <a href="#">298348-298340-26948161</a> |
| would not treat someone with this disorder as too unpredictable. would need a special mental Health Unit to supervise. | <a href="#">298348-298340-27190466</a> |

## 11.20 Hypochondriacal

### 11.20.a Hypochondriacal - What you THINK NOW affects response

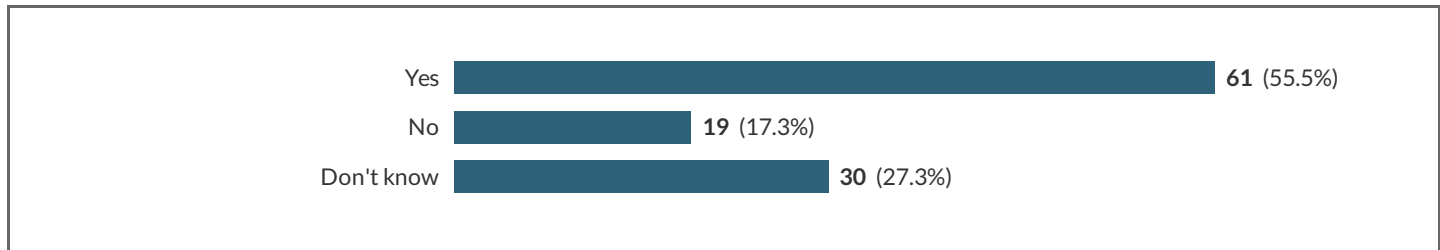

### 11.20.b Hypochondriacal - What you THOUGHT THEN (in clinic) affected response

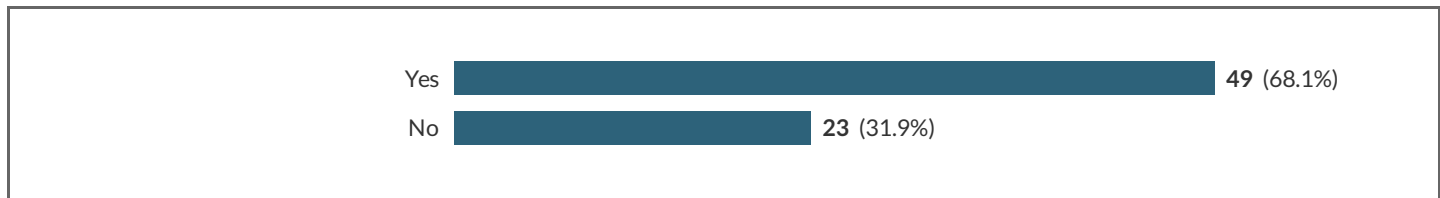

### 11.20.c Hypochondriacal - Space for your comments

| Showing 5 of 9 responses                                                                                                             |                                        |
|--------------------------------------------------------------------------------------------------------------------------------------|----------------------------------------|
| Difficult to answer this                                                                                                             | <a href="#">298348-298340-26488000</a> |
| Patient with this issue was never satisfied and also reported feeling worse pain levels due to acupuncture treatment                 | <a href="#">298348-298340-26924099</a> |
| Hypochondriacs may not want to get well                                                                                              | <a href="#">298348-298340-26971511</a> |
| again depends on the degree. if they have a specific health anxiety, can be very difficult to change their beliefs in the long term. | <a href="#">298348-298340-27190466</a> |
| see under diet and nutrition                                                                                                         | <a href="#">298348-298340-26999243</a> |



## 11.21 Tending to magnify or catastrophise pain or other distress

### 11.21.a Tending to magnify or catastrophise pain or other distress - What you THINK NOW affects response

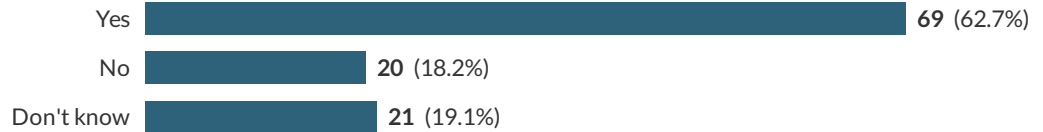

### 11.21.b Tending to magnify or catastrophise pain or other distress - What you THOUGHT THEN (in clinic) affected response

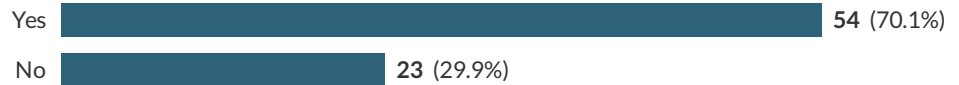

### 11.21.c Tending to magnify or catastrophise pain or other distress - Space for your comments

#### Showing all 5 responses

One of my patients with this tendency seemed to not get much better, but when I questioned symptoms in detail there was definitely improvement. She seemed to almost find it hard to admit improvements and was anxious that she wouldn't be taken seriously if she admitted that she had less pain for example.

[298348-298340-27059499](#)

we deal with this a lot in the chronic pain unit and do a lot of work with them to help them understand what is actually going on and address their beliefs/concerns. by the time they have the acupuncture they're hopefully more open to change. if they're not we would probably get them more mental health input rather than acupuncture.

[298348-298340-27190466](#)

see under diet and nutrition

[298348-298340-26999243](#)

As above

[298348-298340-29682718](#)

Yes, usually who is very sensitive to pain has a slower response to treatment.

[298348-298340-30079001](#)

### 11.a Space for any additional comments you may wish to make:

| Showing 5 of 13 responses                                                                                                                                                                                                                                                                                                                                                                                                                                                                                                                                                                                                                                                                                                                                                                                                                                                                                                                                                                                                                                                                                                                                                                                                                                                                                                                                                                                                                                                                                                  |                                        |
|----------------------------------------------------------------------------------------------------------------------------------------------------------------------------------------------------------------------------------------------------------------------------------------------------------------------------------------------------------------------------------------------------------------------------------------------------------------------------------------------------------------------------------------------------------------------------------------------------------------------------------------------------------------------------------------------------------------------------------------------------------------------------------------------------------------------------------------------------------------------------------------------------------------------------------------------------------------------------------------------------------------------------------------------------------------------------------------------------------------------------------------------------------------------------------------------------------------------------------------------------------------------------------------------------------------------------------------------------------------------------------------------------------------------------------------------------------------------------------------------------------------------------|----------------------------------------|
| Main cases I have seen for poor response are people who feel stuck in their lives and decide they cannot do anything about it. Response to treatment will decrease until very little response is observed. My understanding is that the emotions are trapped inside, leading to Qi stagnation BUT where the patient themselves consciously / unconsciously fight against the acupuncture treatment leading to an "energetic lockdown".                                                                                                                                                                                                                                                                                                                                                                                                                                                                                                                                                                                                                                                                                                                                                                                                                                                                                                                                                                                                                                                                                     | <a href="#">298348-298340-26107614</a> |
| Difficult to answer some questions as a successful outcome depends at least 50% on how the therapist responds to the patient's difficulties which are not necessarily related to that particular visit.                                                                                                                                                                                                                                                                                                                                                                                                                                                                                                                                                                                                                                                                                                                                                                                                                                                                                                                                                                                                                                                                                                                                                                                                                                                                                                                    | <a href="#">298348-298340-26489299</a> |
| I work in an NHS hospital where all of the patients I see have chronic health problems. Patients who do stuff to self-manage their condition tend to get more benefit from treatment where as those who don't do anything to self manage have more short term benefit. Patients who have problems with their mental health seem to be less able to make positive changes and therefore see less benefit                                                                                                                                                                                                                                                                                                                                                                                                                                                                                                                                                                                                                                                                                                                                                                                                                                                                                                                                                                                                                                                                                                                    | <a href="#">298348-298340-26546219</a> |
| Some patients hold their illnesses very dearly to themselves and don't want to be without it. However they do value being listened to, touched, and cared for in some cases. Others are on a merry go round of trying loads of different therapies although they are not really serious about being better. Presumably the need to be seen as 'definitely ill' or 'incurable' helps them cope in their life at an unconscious level (so their minds would have them believe).                                                                                                                                                                                                                                                                                                                                                                                                                                                                                                                                                                                                                                                                                                                                                                                                                                                                                                                                                                                                                                              | <a href="#">298348-298340-26920171</a> |
| I work in a multidisciplinary team, where many patients have input from several health professionals, all of whom have many years of experience in the field, all working together. Even so, there's a small percentage of patients that prove difficult to work with, despite our best efforts. This makes me feel that other practitioners that don't have that support and experience, could be vulnerable to being drawn in to a difficult situation or end up in a cycle of treatment going nowhere they can't get out of. Acupuncture can be a wonderful thing but it can't do the whole change on its own. If the patient is not correctly diagnosed from a Western perspective, especially MSK issues, then they won't be able to do what's needed to get their body in the best condition to help their health. Also there are a lot of people with undiagnosed or untreated mental health issues that the patient does not recognise as being connected to their physical health problem and neither may the practitioner. We have long discussions with the Mental Health team about their referrals of patients to the Chronic Pain Clinic as to which needs to be dealt with 1st. As most acupuncturists are sole practitioners who are unlikely to have the breadth of knowledge and experience in the team I work with, and so I feel that some people don't know what they don't know and could end up becoming dispirited from negative experiences. I hope this isn't the case but I suspect that it is. | <a href="#">298348-298340-27190466</a> |

**12** Particular patient characteristics, attitudes or experience that you think may contribute to how well (or poorly) they respond to acupuncture. (Information on those that are asterisked can be found under 'More Info', above.)

**12.1** Past surgery or other medical procedures considered 'invasive'

**12.1.a** Past surgery or other medical procedures considered 'invasive' - What you THINK NOW affects response

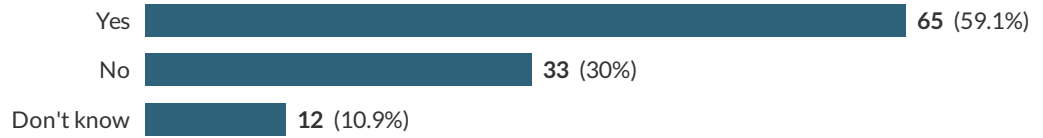

**12.1.b** Past surgery or other medical procedures considered 'invasive' - What you THOUGHT THEN (in clinic) affected response

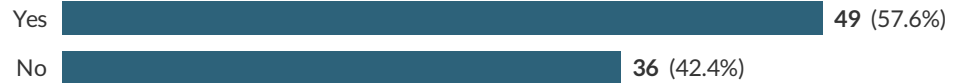

**12.1.c** Past surgery or other medical procedures considered 'invasive' - Space for your comments

| Showing 5 of 9 responses                                                                                                                                                              |                                        |
|---------------------------------------------------------------------------------------------------------------------------------------------------------------------------------------|----------------------------------------|
| In case of very significant structural damage e.g. bone tumor following surgery.                                                                                                      | <a href="#">298348-298340-26107614</a> |
| Depends on the surgery                                                                                                                                                                | <a href="#">298348-298340-26670536</a> |
| Care needed with needle technique and choice of points                                                                                                                                | <a href="#">298348-298340-26951369</a> |
| gastric banding/bypass -partly because of the problems thye have absorbing nutrient as a result of the surgery, partly because there are often a mental/emotional issues as a factor. | <a href="#">298348-298340-27190466</a> |
| surgery and medical interventions alter the state of qi and hence the response to acupuncture                                                                                         | <a href="#">298348-298340-26999243</a> |

**12.2** Previous 'doctor shopping'\*

**12.2.a** Previous 'doctor shopping'\* - What you THINK NOW affects response

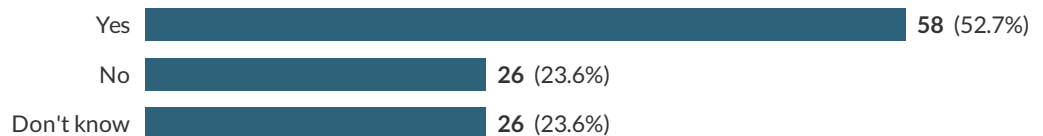

**12.2.b** Previous 'doctor shopping'\* - What you THOUGHT THEN (in clinic) affected response

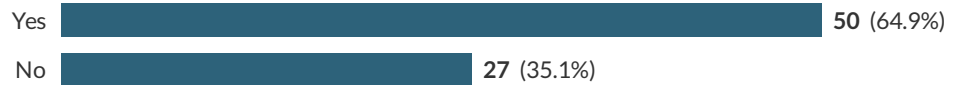

### 12.2.c Previous 'doctor shopping'\* - Space for your comments

| Showing 5 of 10 responses                                                                                                                                                                         |                                        |
|---------------------------------------------------------------------------------------------------------------------------------------------------------------------------------------------------|----------------------------------------|
| Unrealistic expectations                                                                                                                                                                          | <a href="#">298348-298340-26910831</a> |
| Patient tended to shop around different professions seeking an answer to her problems while all the time knowing that the root of her issue was her addiction to sugar and psychological problems | <a href="#">298348-298340-26924099</a> |
| May not really know what they are looking for and not positive about treatment.                                                                                                                   | <a href="#">298348-298340-26997929</a> |
| we see this all the time in the Chronic Pain Clinic. doesn't preclude them from treatment, unless they persist in wanting a specific treatment.                                                   | <a href="#">298348-298340-27190466</a> |
| 'doctor shoppers' tend to be less responsive to anything other than the outcome they want. My guess is that their response to acupuncture is less than average                                    | <a href="#">298348-298340-26999243</a> |

### 12.3 Multiple symptoms (co-morbidities) or somatisation

#### 12.3.a Multiple symptoms (co-morbidities) or somatisation - What you THINK NOW affects response

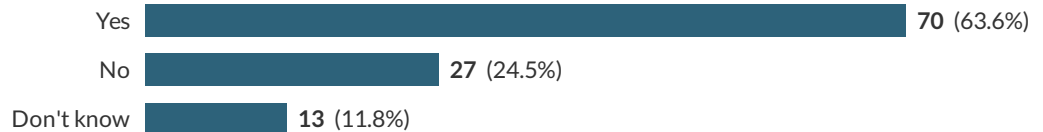

#### 12.3.b Multiple symptoms (co-morbidities) or somatisation - What you THOUGHT THEN (in clinic) affected response

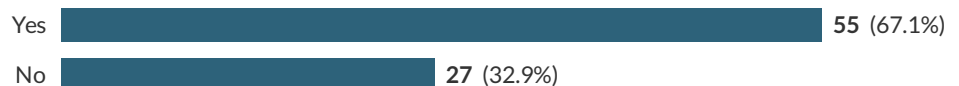

### 12.3.c Multiple symptoms (co-morbidities) or somatisation - Space for your comments

| Showing 5 of 12 responses                                                                                                                                                                                                     |                                        |
|-------------------------------------------------------------------------------------------------------------------------------------------------------------------------------------------------------------------------------|----------------------------------------|
| Takes some time to de-layer the pattern but the response is there.                                                                                                                                                            | <a href="#">298348-298340-26107614</a> |
| It deoends what they are                                                                                                                                                                                                      | <a href="#">298348-298340-26488000</a> |
| most of my patients have complex health conditions and many co-morbidities and so it's often difficult to get long term benefital results                                                                                     | <a href="#">298348-298340-26546219</a> |
| Patient's who have several symptoms at once, sometimes come and add another so until practitioner delves deeper it's hard to see that old symptoms are improving, perhaps creating space for the patient to analyse new ones. | <a href="#">298348-298340-27066176</a> |
| doesn't preclude treatment and some people who were considered poor responders do very well. However the more health problems someone ahs will affect their body's ability to respond.                                        | <a href="#">298348-298340-27190466</a> |

## 12.4 Problems with addiction

### 12.4.a Problems with addiction - What you THINK NOW affects response

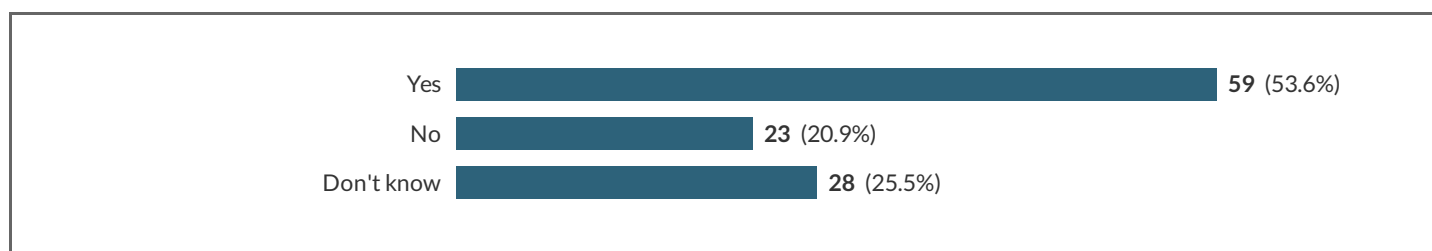

### 12.4.b Problems with addiction - What you THOUGHT THEN (in clinic) affected response

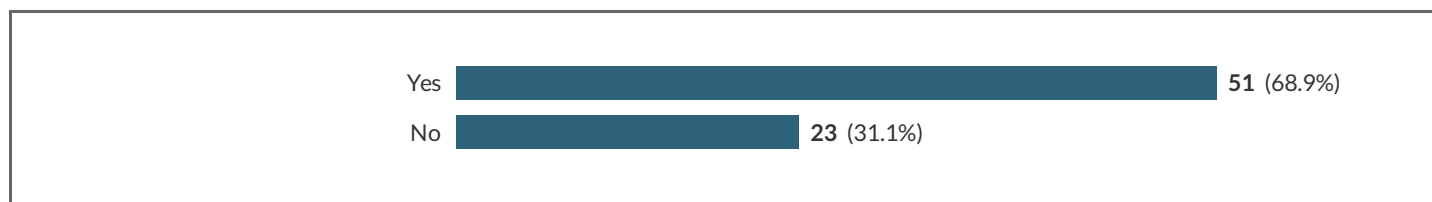

### 12.4.c Problems with addiction - Space for your comments

| Showing 5 of 7 responses                                                                                                                                                                                                                                                                                               |                                        |
|------------------------------------------------------------------------------------------------------------------------------------------------------------------------------------------------------------------------------------------------------------------------------------------------------------------------|----------------------------------------|
| Response will be there if for a short time as addiction is an aggravating factor.                                                                                                                                                                                                                                      | <a href="#">298348-298340-26107614</a> |
| apart from the known effects on their physical health and often have associated mental health problems, the physiological effects on the brain can mean that their pain receptors and pain centres can no longer respond as they need to. even if they have been clean for along time, this damage can be irreversible | <a href="#">298348-298340-27190466</a> |
| I find that their response to acupuncture is less                                                                                                                                                                                                                                                                      | <a href="#">298348-298340-26999243</a> |
| Yes as patients has come to realise that cravings are reduced they feel more relaxed and sleep better when they have acupuncture compared to when they do not attend clinic regularly.                                                                                                                                 | <a href="#">298348-298340-29668534</a> |
| Haven't met this situation.                                                                                                                                                                                                                                                                                            | <a href="#">298348-298340-29682718</a> |

## 12.5 Defensive\*

### 12.5.a Defensive\* - What you THINK NOW affects response

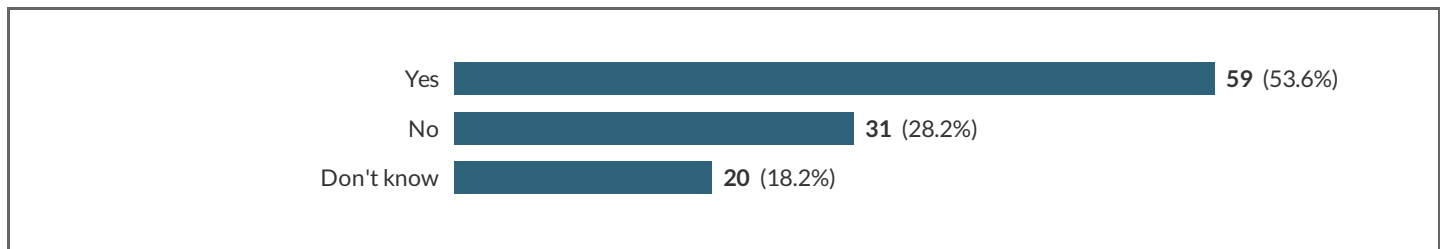

### 12.5.b Defensive\* - What you THOUGHT THEN (in clinic) affected response

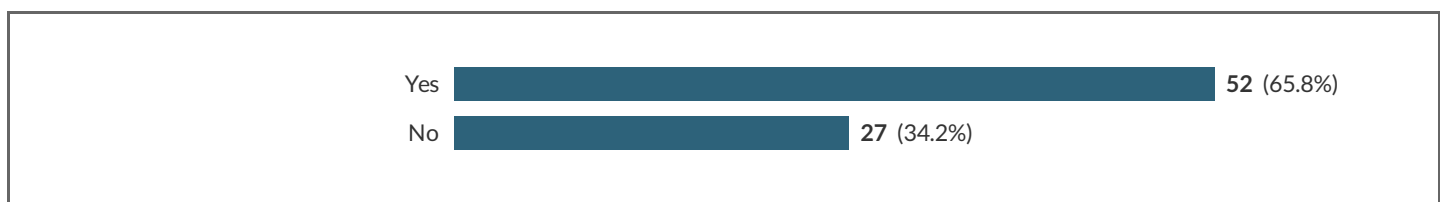

### 12.5.c Defensive\* - Space for your comments

| Showing all 5 responses                                                                                                                     |                                        |
|---------------------------------------------------------------------------------------------------------------------------------------------|----------------------------------------|
| Linked to treatment perception, could generate and energetic lockdown.                                                                      | <a href="#">298348-298340-26107614</a> |
| whether they are open to experience, or defensive, or any of the following circumstances will clearly effect, how they react to acupuncture | <a href="#">298348-298340-26999243</a> |
| If the patient feels defensive, I would not treat as there is no thrust.                                                                    | <a href="#">298348-298340-29682718</a> |
| Yes, if experiencing treatment as an invasion.                                                                                              | <a href="#">298348-298340-30079001</a> |
| Can make changes appear more slowly                                                                                                         | <a href="#">298348-298340-30475628</a> |

## 12.6 Open to experience\*

### 12.6.a Open to experience\* - What you THINK NOW affects response

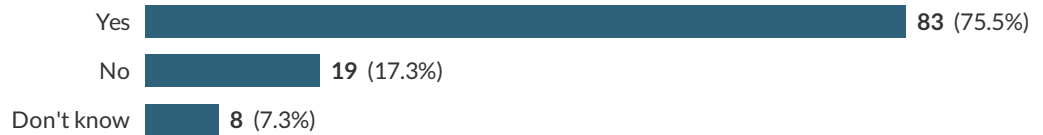

### 12.6.b Open to experience\* - What you THOUGHT THEN (in clinic) affected response

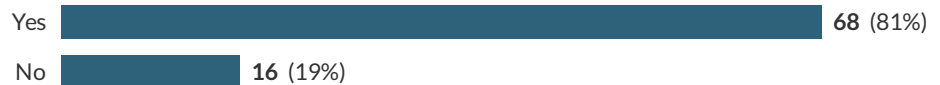

### 12.6.c Open to experience\* - Space for your comments

| Showing 5 of 7 responses                                                                                                                    |                                        |
|---------------------------------------------------------------------------------------------------------------------------------------------|----------------------------------------|
| Potentially greater response as patient is ready to embrace the flow of change.                                                             | <a href="#">298348-298340-26107614</a> |
| Positive                                                                                                                                    | <a href="#">298348-298340-26910831</a> |
| ibid                                                                                                                                        | <a href="#">298348-298340-26999243</a> |
| Some people have an immediate response and therefore do not maintain treatments and return after a month when symptoms return.              | <a href="#">298348-298340-29668534</a> |
| Some patient just want to try to see if their back pain would ease. I would offer the the first treatment for free, for them to experience. | <a href="#">298348-298340-29682718</a> |

## 12.7 Suggestible

### 12.7.a Suggestible - What you THINK NOW affects response

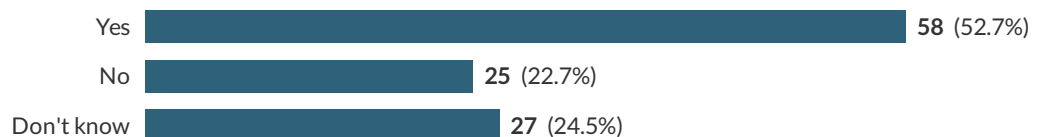

### 12.7.b Suggestible - What you THOUGHT THEN (in clinic) affected response

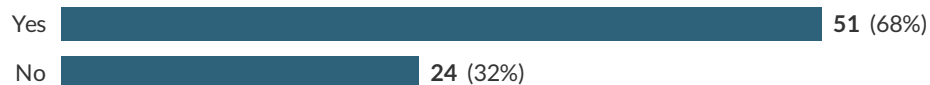

### 12.7.c Suggestible - Space for your comments

| Showing all 3 responses                                                                       |                                        |
|-----------------------------------------------------------------------------------------------|----------------------------------------|
| Just better long term result if patient is ready to make some changes within their lifestyle. | <a href="#">298348-298340-26107614</a> |
| ibid                                                                                          | <a href="#">298348-298340-26999243</a> |
| Do not understand the implication.                                                            | <a href="#">298348-298340-30079001</a> |

## 12.8 Sceptical

### 12.8.a Sceptical - What you THINK NOW affects response

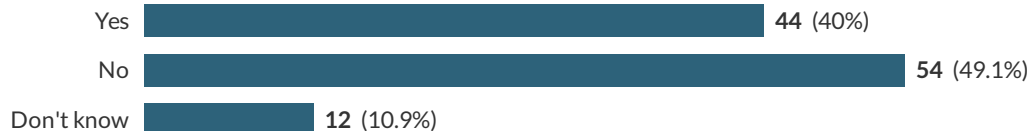

### 12.8.b Sceptical - What you THOUGHT THEN (in clinic) affected response

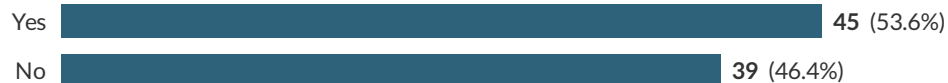

### 12.8.c Sceptical - Space for your comments



| Showing 5 of 11 responses                                                                                                                                                                                                        |                                        |
|----------------------------------------------------------------------------------------------------------------------------------------------------------------------------------------------------------------------------------|----------------------------------------|
| Scepticism about acupuncture makes no difference                                                                                                                                                                                 | <a href="#">298348-298340-26488000</a> |
| DNA acupuncture removes pain immediately, this removes skepticism                                                                                                                                                                | <a href="#">298348-298340-26924099</a> |
| ibid                                                                                                                                                                                                                             | <a href="#">298348-298340-26999243</a> |
| Sceptical patients- great when treatments go well with good response as they can't deny it. However they will always play it down. Saying they never feel any different after treatment- but also saying symptoms have improved! | <a href="#">298348-298340-29037670</a> |
| A lot of people are sceptical at first.                                                                                                                                                                                          | <a href="#">298348-298340-29228864</a> |

## 12.9 Placebo responsive\*

### 12.9.a Placebo responsive\* - What you THINK NOW affects response

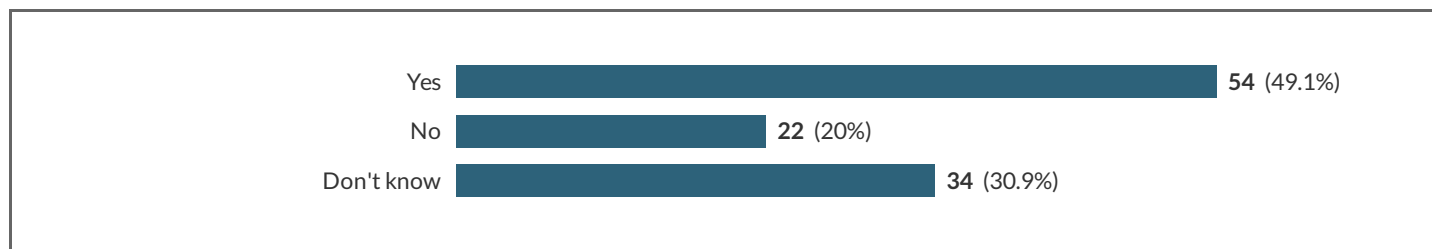

### 12.9.b Placebo responsive\* - What you THOUGHT THEN (in clinic) affected response

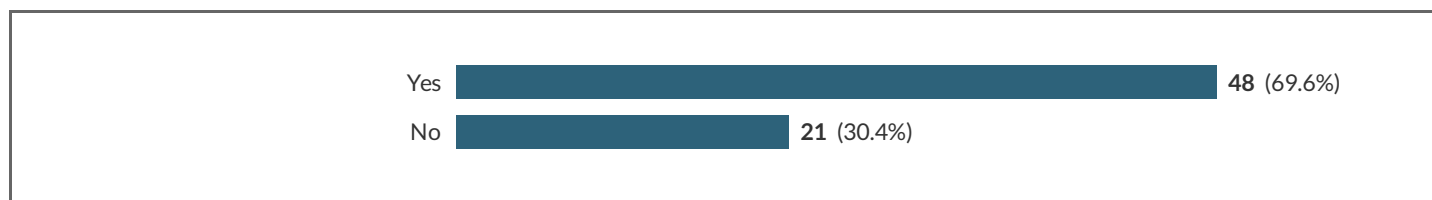

### 12.9.c Placebo responsive\* - Space for your comments

| Showing 5 of 8 responses                         |                                        |
|--------------------------------------------------|----------------------------------------|
| Obviously a central issue in acupuncture!        | <a href="#">298348-298340-26488000</a> |
| ibid                                             | <a href="#">298348-298340-26999243</a> |
| what?                                            | <a href="#">298348-298340-29496506</a> |
| Some people may be responsive to this situation. | <a href="#">298348-298340-29682718</a> |
| Yes but only in the very short term.             | <a href="#">298348-298340-29749243</a> |

## 12.10 Able to trust others

### 12.10.a Able to trust others - What you THINK NOW affects response

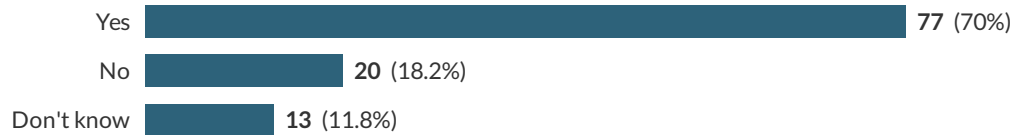

### 12.10.b Able to trust others - What you THOUGHT THEN (in clinic) affected response

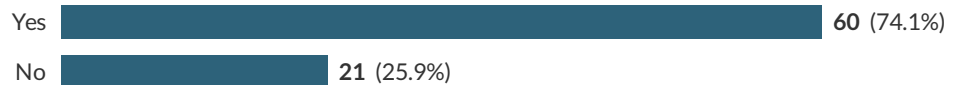

### 12.10.c Able to trust others - Space for your comments

| Showing 5 of 7 responses                                                                                            |                                        |
|---------------------------------------------------------------------------------------------------------------------|----------------------------------------|
| Linked to treatment perception, could generate and energetic lockdown if open distrust.                             | <a href="#">298348-298340-26107614</a> |
| Not being open about symptoms and outcome.                                                                          | <a href="#">298348-298340-26670536</a> |
| establishing trust is generally key to successful treatment, sometimes it takes longer to achieve for some patients | <a href="#">298348-298340-26948161</a> |
| ibid                                                                                                                | <a href="#">298348-298340-26999243</a> |
| but needed to have any threatment                                                                                   | <a href="#">298348-298340-29496506</a> |

## 12.11 Willing to follow advice or instructions

### 12.11.a Willing to follow advice or instructions - What you THINK NOW affects response

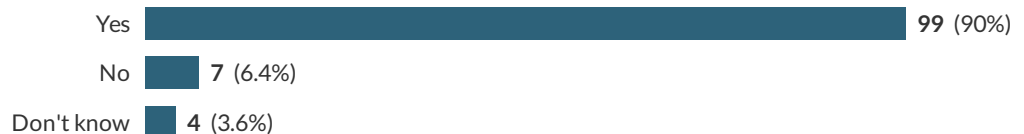

12.11.b Willing to follow advice or instructions - What you THOUGHT THEN (in clinic) affected response

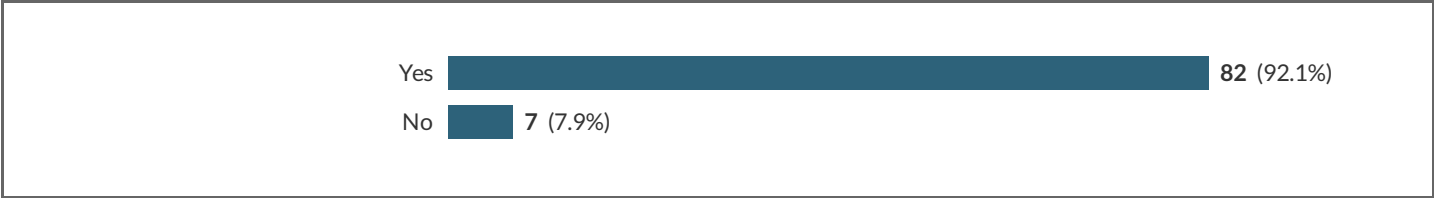

12.11.c Willing to follow advice or instructions - Space for your comments

| Showing 5 of 8 responses                                                                      |                                        |
|-----------------------------------------------------------------------------------------------|----------------------------------------|
| Just better long term result if patient is ready to make some changes within their lifestyle. | <a href="#">298348-298340-26107614</a> |
| We are only part of the healing, engaged motivated patients do well                           | <a href="#">298348-298340-26948161</a> |
| ibid                                                                                          | <a href="#">298348-298340-26999243</a> |
| give right level of advice                                                                    | <a href="#">298348-298340-29496506</a> |
| More dietary advice.                                                                          | <a href="#">298348-298340-29668534</a> |

12.12 Committed to long-term treatment

12.12.a Committed to long-term treatment - What you THINK NOW affects response

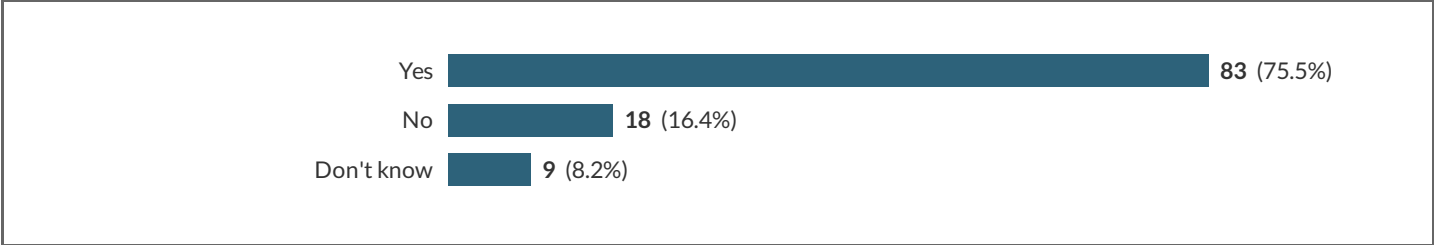

12.12.b Committed to long-term treatment - What you THOUGHT THEN (in clinic) affected response

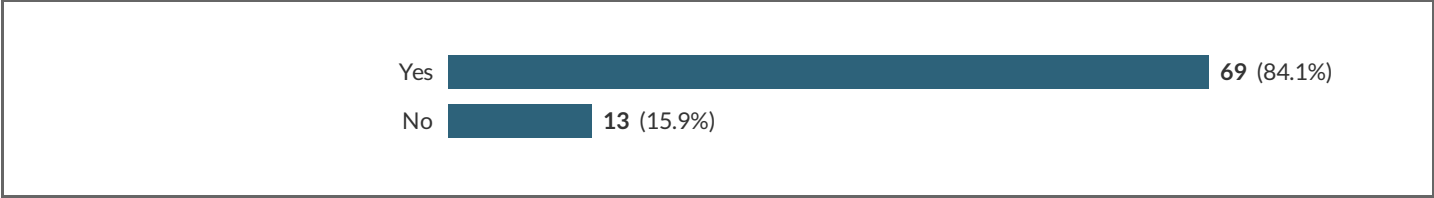

12.12.c Committed to long-term treatment - Space for your comments

| Showing 5 of 10 responses                                                                                                                                                            |                                        |
|--------------------------------------------------------------------------------------------------------------------------------------------------------------------------------------|----------------------------------------|
| Most times, greatest response comes from first treatment as patient's Qi and emotions have been restrained for some time.                                                            | <a href="#">298348-298340-26107614</a> |
| Not normally relevant - can't predict this initially                                                                                                                                 | <a href="#">298348-298340-26488000</a> |
| I always give patients the control to come back 'when they feel they are ready for another treatment' as opposed to a forced set of treatments - one a week for the next 8 weeks.... | <a href="#">298348-298340-26489299</a> |
| unfortunately some people are committed to long term treatment without wanting to change and may use it as an excuse not to change.                                                  | <a href="#">298348-298340-27190466</a> |
| ibid                                                                                                                                                                                 | <a href="#">298348-298340-26999243</a> |

### 12.13 Tending to arousal (extraverted) or avoidance (introverted)

#### 12.13.a Tending to arousal (extraverted) or avoidance (introverted) - What you THINK NOW affects response

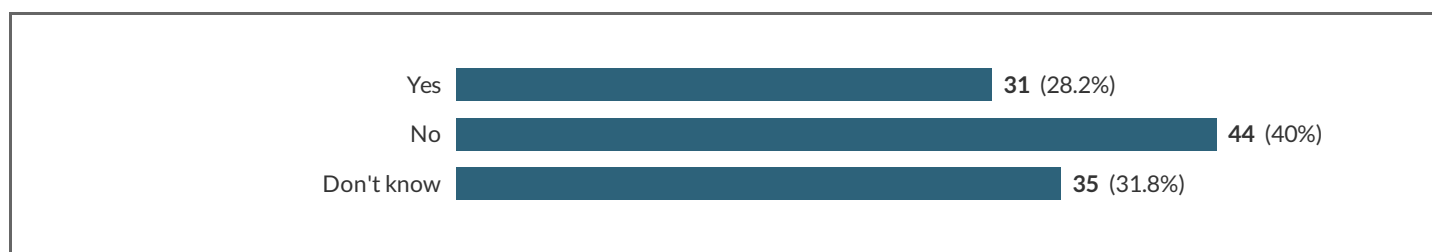

#### 12.13.b Tending to arousal (extraverted) or avoidance (introverted) - What you THOUGHT THEN (in clinic) affected response

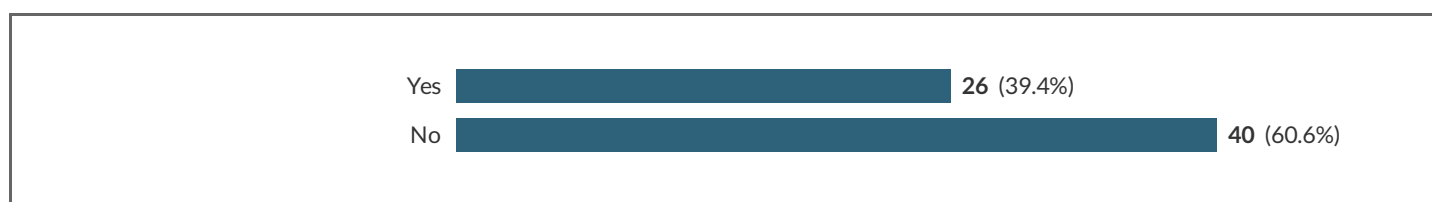

#### 12.13.c Tending to arousal (extraverted) or avoidance (introverted) - Space for your comments

| Showing 1 response |                                        |
|--------------------|----------------------------------------|
| ibid               | <a href="#">298348-298340-26999243</a> |

### 12.14 Bodily aware or sensitive

#### 12.14.a Bodily aware or sensitive - What you THINK NOW affects response

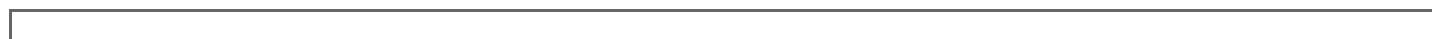

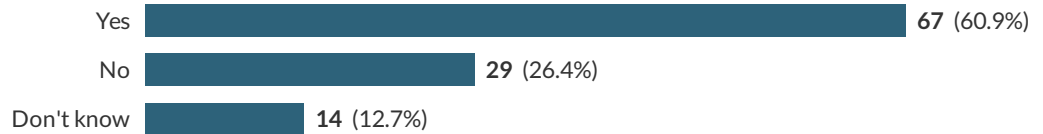

#### 12.14.b Bodily aware or sensitive - What you THOUGHT THEN (in clinic) affected response

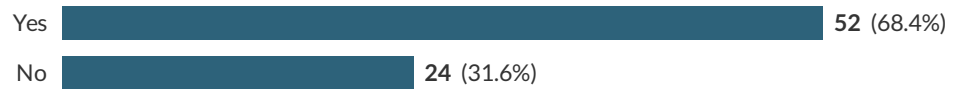

#### 12.14.c Bodily aware or sensitive - Space for your comments

| Showing 5 of 6 responses                                                                            |                                        |
|-----------------------------------------------------------------------------------------------------|----------------------------------------|
| You can get patients who don't want you to needle in certain places that can affect treatment       | <a href="#">298348-298340-26997929</a> |
| ibid                                                                                                | <a href="#">298348-298340-26999243</a> |
| Better able to communicate the changes rather than better responders                                | <a href="#">298348-298340-28415546</a> |
| Regular attendees develop sensitivity to needles on some occasions.                                 | <a href="#">298348-298340-29668534</a> |
| Yoga teachers I find very sensitive and describe energy moving around their bodies with acupuncture | <a href="#">298348-298340-29749243</a> |

#### 12.15 Emotionally aware or sensitive

##### 12.15.a Emotionally aware or sensitive - What you THINK NOW affects response

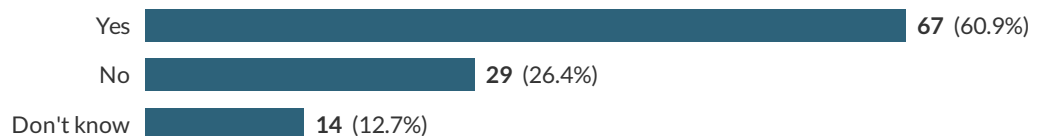

##### 12.15.b Emotionally aware or sensitive - What you THOUGHT THEN (in clinic) affected response

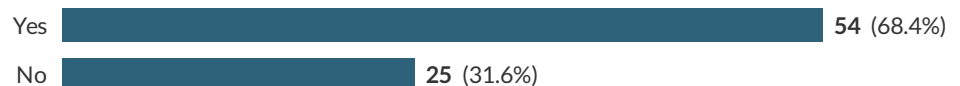

### 12.15.c Emotionally aware or sensitive - Space for your comments

| Showing all 4 responses                                                                                                                                                                                                                                             |                                        |
|---------------------------------------------------------------------------------------------------------------------------------------------------------------------------------------------------------------------------------------------------------------------|----------------------------------------|
| ibid                                                                                                                                                                                                                                                                | <a href="#">298348-298340-26999243</a> |
| Yes - because these patients are already aware how their emotional health affects the rest of them and are able to express themselves extremely honestly and I think this helps sometimes with finding the root of a problem and therefore relief from the symptom. | <a href="#">298348-298340-29749243</a> |
| Yes, it helps but it this can also improve with the treatment.                                                                                                                                                                                                      | <a href="#">298348-298340-30079001</a> |
| Helps                                                                                                                                                                                                                                                               | <a href="#">298348-298340-30475628</a> |

### 12.16 Alexithymic\*

#### 12.16.a Alexithymic\* - What you THINK NOW affects response

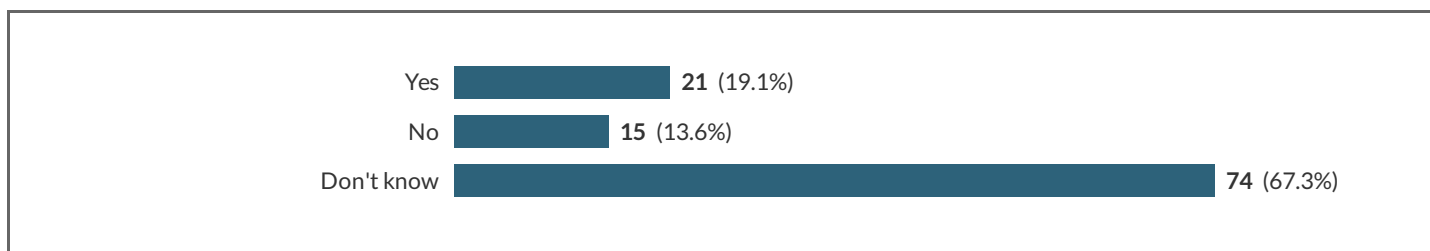

#### 12.16.b Alexithymic\* - What you THOUGHT THEN (in clinic) affected response

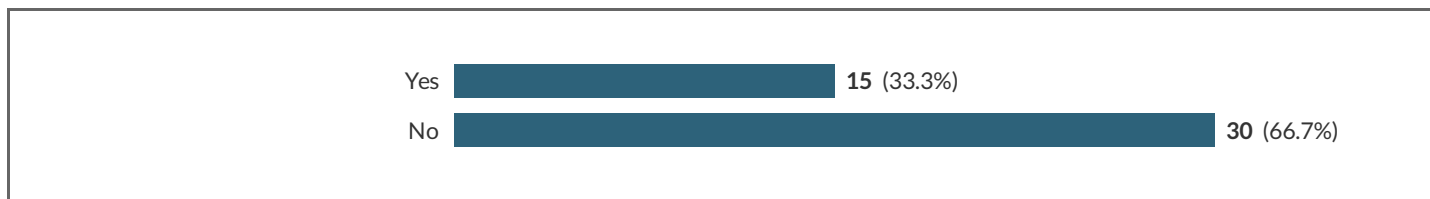

#### 12.16.c Alexithymic\* - Space for your comments

| Showing 5 of 6 responses                                                                                              |                                        |
|-----------------------------------------------------------------------------------------------------------------------|----------------------------------------|
| Very difficult to tell if a patient is alexithymic - can only respond to how the patient presents - nonjudgmental.    | <a href="#">298348-298340-26489299</a> |
| I find trust is a key component in effective treatment                                                                | <a href="#">298348-298340-26948161</a> |
| ibid                                                                                                                  | <a href="#">298348-298340-26999243</a> |
| Only because I'm really not sure what this means despite reading the explanation...                                   | <a href="#">298348-298340-29749243</a> |
| Not sure what this means. Feelings are by definition 'bodily sensations' ( am I Alexithymic, if so, how would I know) | <a href="#">298348-298340-29870129</a> |

## 12.17 Qi strong or weak

### 12.17.a Qi strong or weak - What you THINK NOW affects response

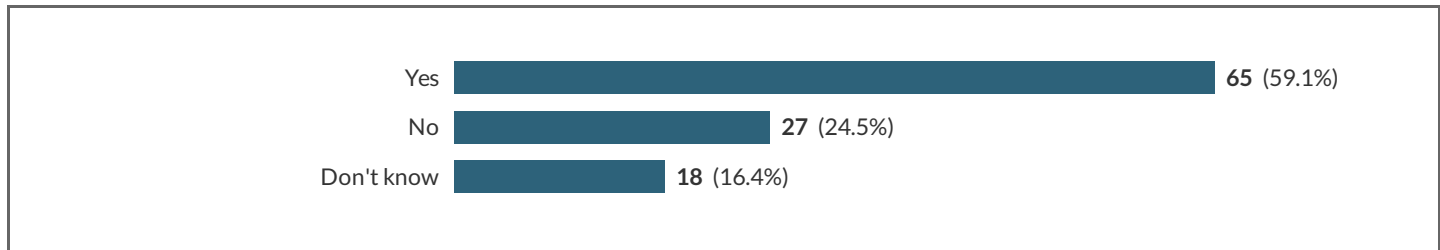

### 12.17.b Qi strong or weak - What you THOUGHT THEN (in clinic) affected response

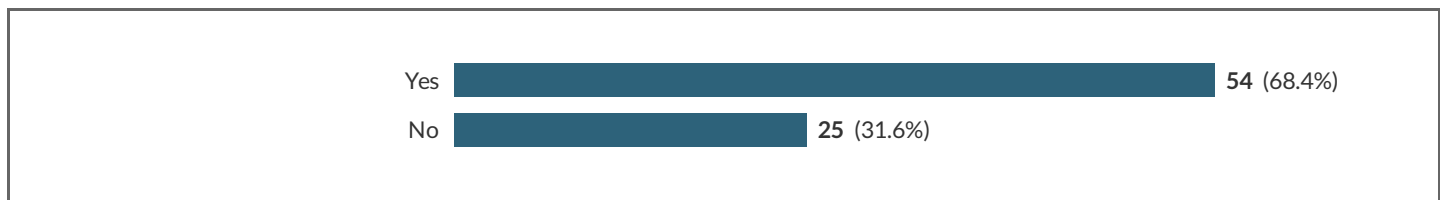

### 12.17.c Qi strong or weak - Space for your comments

| Showing 5 of 13 responses                                                                                                                                                                                                                              |                                        |
|--------------------------------------------------------------------------------------------------------------------------------------------------------------------------------------------------------------------------------------------------------|----------------------------------------|
| Same as comments for Jing deficiency. However there will be some good response as the Qi is built up, generally around the 2nd or 3rd treatment.                                                                                                       | <a href="#">298348-298340-26107614</a> |
| Don't use this terminology                                                                                                                                                                                                                             | <a href="#">298348-298340-26488000</a> |
| Some patients are not so aware. You can only try to illicit deqi for a short time for some patients as they can become distressed. Treatments work even when deqi is not felt. Patients who seem to have strong qi sometimes have lack of sensitivity. | <a href="#">298348-298340-26489299</a> |
| Weak pulses show deficient conditions which take longer to get beneficial results from                                                                                                                                                                 | <a href="#">298348-298340-26546219</a> |
| There usually is some sort of improvement. Whatever the state of Qi                                                                                                                                                                                    | <a href="#">298348-298340-26670536</a> |

---

## 12.18 Particular TCM/5E diagnostic patterns (please specify)

---

### 12.18.a Particular TCM/5E diagnostic patterns (please specify) - What you THINK NOW affects response

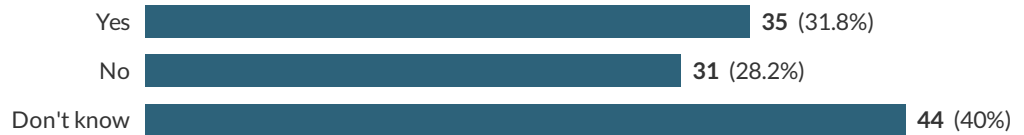

### 12.18.b Particular TCM/5E diagnostic patterns (please specify) - What you THOUGHT THEN (in clinic) affected response

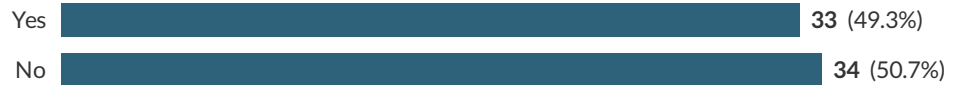

### 12.18.c Particular TCM/5E diagnostic patterns (please specify) - Space for your comments

| Showing 5 of 32 responses                                                                                                                                          |                                        |
|--------------------------------------------------------------------------------------------------------------------------------------------------------------------|----------------------------------------|
| LI channel especially                                                                                                                                              | <a href="#">298348-298340-26471588</a> |
| Chronic complaints with deep emotional roots are difficult to treat.                                                                                               | <a href="#">298348-298340-26471554</a> |
| Some conditions get better responses than others. For example I would expect to get better results for someone with liver qi stagnation over kidney yin deficiency | <a href="#">298348-298340-26546219</a> |
| HW or ID/Eds can be amazingly effective                                                                                                                            | <a href="#">298348-298340-26670536</a> |
| I follow certain patterns and 'recipes' adding in various points when necessary                                                                                    | <a href="#">298348-298340-26786544</a> |

---

### 12.a Space for any additional comments you may wish to make:



| Showing 5 of 6 responses                                                                                                      |                                        |
|-------------------------------------------------------------------------------------------------------------------------------|----------------------------------------|
| .                                                                                                                             | <a href="#">298348-298340-26488000</a> |
| the answer to you questions seem obvious to me. I am amazed, if not bewildered, that anyone thought that that would not be so | <a href="#">298348-298340-26999243</a> |
| All factors of all people affect the outcome of acupuncture.                                                                  | <a href="#">298348-298340-29225890</a> |
| I find that some patients may be sceptical or alexithymic for example but with treatment this changes                         | <a href="#">298348-298340-29743878</a> |
| Pointless                                                                                                                     | <a href="#">298348-298340-29782088</a> |

- 13** Do you think that some patients respond consistently well or poorly to acupuncture, almost regardless of other factors such as the condition treated, their state of health at the time, etc.?

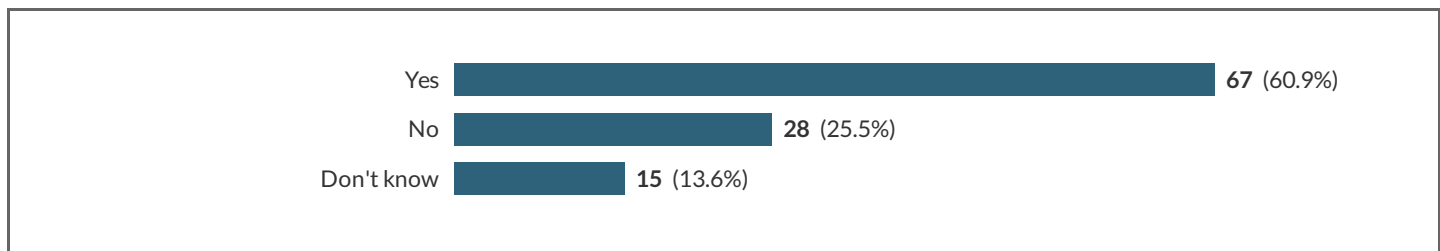

- 14** Do you find that an immediate response to treatment (e.g. a change in relaxation or a sense of wellbeing) is likely to indicate that a patient will experience longer-term changes as well?

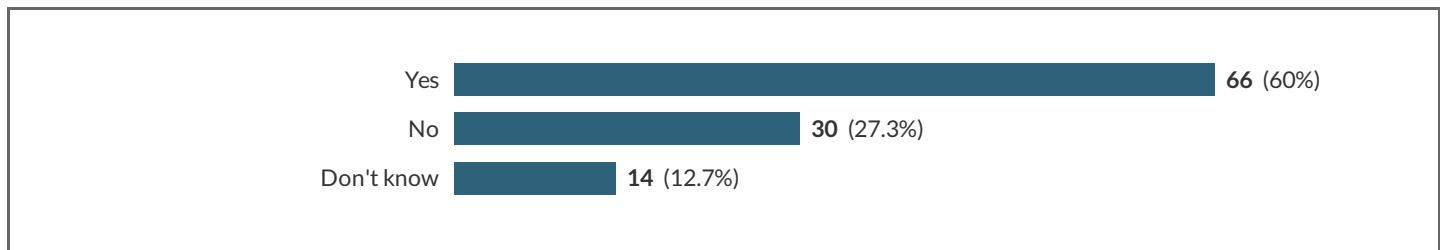

- 15** Have you had acupuncture treatment yourself?

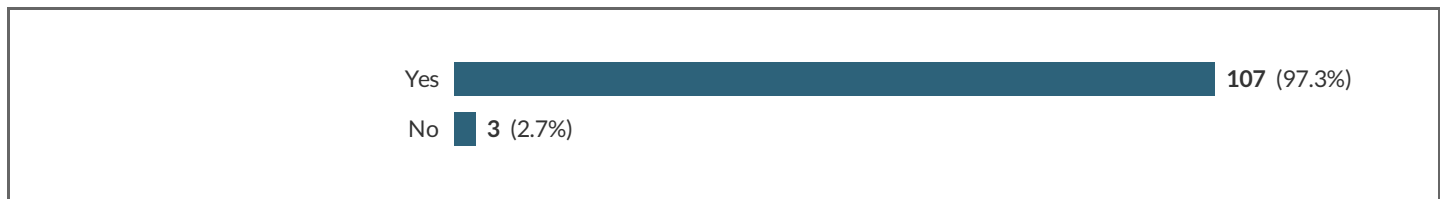

- 15.a** If you answered 'Yes' to Q 15, would you describe yourself as:

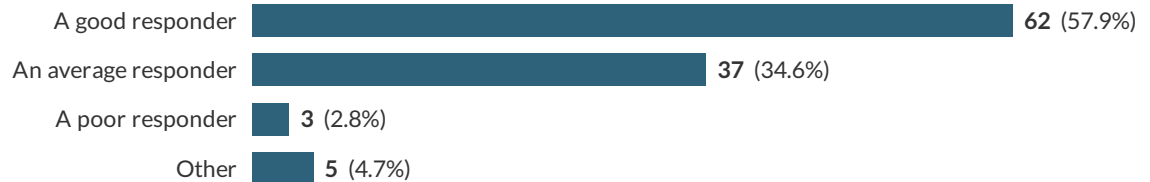

**15.a.i** Do you have any thoughts about why you respond as you do? (in your own words)

| Showing 5 of 82 responses                                                                                                                                                                                                                                                                                                                                                                            |                                        |
|------------------------------------------------------------------------------------------------------------------------------------------------------------------------------------------------------------------------------------------------------------------------------------------------------------------------------------------------------------------------------------------------------|----------------------------------------|
| I have only acupuncture treatment for minor conditions, so response is good but not life-changing as I care well for myself with regular Nei-gong / Qi-gong and physical exercise. Also, I mainly treat myself, which is usually different when getting treated by someone else because of the difference in energy frequency (stronger signal & response with energy / qi different than yourself). | <a href="#">298348-298340-26107614</a> |
| No                                                                                                                                                                                                                                                                                                                                                                                                   | <a href="#">298348-298340-26471588</a> |
| Expectation that it will be effective!                                                                                                                                                                                                                                                                                                                                                               | <a href="#">298348-298340-26472615</a> |
| Just the way I'm built, presumably.                                                                                                                                                                                                                                                                                                                                                                  | <a href="#">298348-298340-26488000</a> |
| Too analytical about the treatment given and very critical of the outcome. Usually see it as a learning experience.                                                                                                                                                                                                                                                                                  | <a href="#">298348-298340-26489299</a> |

**15.a.ii** If you selected 'Other', please specify.

| Showing all 5 responses                                                                                  |                                        |
|----------------------------------------------------------------------------------------------------------|----------------------------------------|
| Point choice and insertion, location techniques                                                          | <a href="#">298348-298340-26951369</a> |
| I am a slow responder- it may take several days before I notice a difference and the changes are gradual | <a href="#">298348-298340-28415546</a> |
| It depends on the practitioner and the quality of their diagnosis and treatment                          | <a href="#">298348-298340-29743878</a> |
| I have no way of knowing                                                                                 | <a href="#">298348-298340-29782088</a> |
| See above plus I don't always respond the same way every time.                                           | <a href="#">298348-298340-29870129</a> |

**16** What percentage of your patients would you describe as good responders to acupuncture?

**16.1** 0% vs 100%

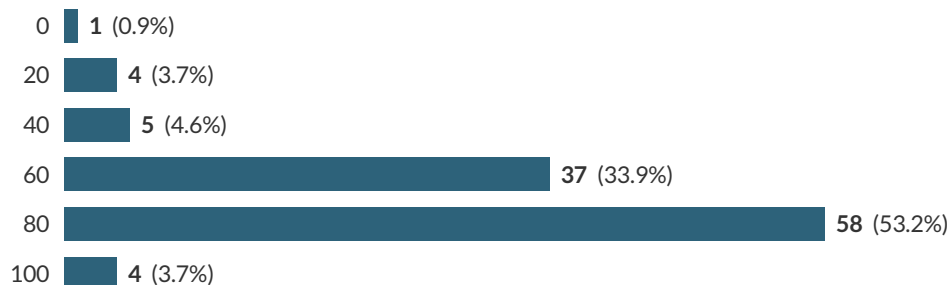

**17** What percentage of your patients would you describe as poor responders to acupuncture?

**17.1** 0% vs 100%

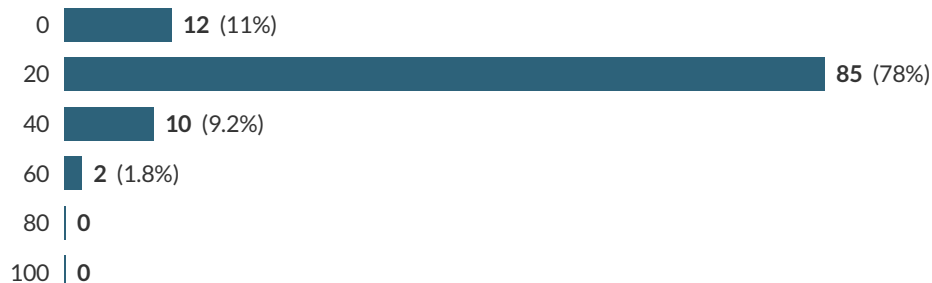

**18** In your experience, have you found any conditions that respond particularly well to acupuncture? If so, please give some examples here:

| Showing 5 of 103 responses                                                                                                                     |                                        |
|------------------------------------------------------------------------------------------------------------------------------------------------|----------------------------------------|
| IBS, Fibromyalgia, Stress, Anxiety, Asthma, PMS, Musculoskeletal disorders, stroke, Infertility, light mental disorders / emotional imbalance. | <a href="#">298348-298340-26107614</a> |
| Emotional symptoms and MSK conditions                                                                                                          | <a href="#">298348-298340-26269325</a> |
| OA knee<br>non-specific and radiating LBP<br>frozen shoulder<br>tendonopathy<br>neuropathic pain                                               | <a href="#">298348-298340-26471564</a> |
| Wry neck<br>Achilles tendonitis<br>Tennis elbow                                                                                                | <a href="#">298348-298340-26471588</a> |
| Anxiety                                                                                                                                        | <a href="#">298348-298340-26471554</a> |

- 19 In your experience, have you found any conditions that respond particularly poorly to acupuncture? If so, give please some examples here:

| Showing 5 of 99 responses                                                                                                                                                                                                                                           |                                        |
|---------------------------------------------------------------------------------------------------------------------------------------------------------------------------------------------------------------------------------------------------------------------|----------------------------------------|
| Bloating, when patient carries on with poor lifestyle and does not care about aggravating factors. Emotions, when patient refuses to take the time to deep dive inside their heads and remain blocked in their current pattern of dissatisfaction with their lives. | <a href="#">298348-298340-26107614</a> |
| autoimmune conditions                                                                                                                                                                                                                                               | <a href="#">298348-298340-26269325</a> |
| smoking cessation                                                                                                                                                                                                                                                   | <a href="#">298348-298340-26471588</a> |
| Chronic pain with multiple problems                                                                                                                                                                                                                                 | <a href="#">298348-298340-26471554</a> |
| Post-herpetic neuralgia of chest or abdomen.<br>Deafness                                                                                                                                                                                                            | <a href="#">298348-298340-26472615</a> |

- 20 Space for any further comments you may have:

| Showing 5 of 37 responses                                                                                                                                                                                                                                                                                                                                                                                                                                                |                                        |
|--------------------------------------------------------------------------------------------------------------------------------------------------------------------------------------------------------------------------------------------------------------------------------------------------------------------------------------------------------------------------------------------------------------------------------------------------------------------------|----------------------------------------|
| Thank you for creating this survey, truly interesting and looking forward to seeing the results.                                                                                                                                                                                                                                                                                                                                                                         | <a href="#">298348-298340-26107614</a> |
| As with the problem of short-term response without longer benefit, the difficulty of good v poor responders may be due to patient characteristics, but is actually more likely to be due to either poor/good interaction with the acupuncturist or simply the wrong method of treatment with inappropriate points used or type of stimulation.                                                                                                                           | <a href="#">298348-298340-26472615</a> |
| Response strength is continuously variable. It's a matter of degree, not all or nothing, so percentages are fairly meaningless.<br><br>I recognise a group I call pseudo-strong reactors. These react strongly the first time, but thereafter nothing happens. Curiously, these people often believe strongly that acupuncture is going to work. The best results are often in unimaginative middle-aged men who tell you afterwards that they didn't expect it to work! | <a href="#">298348-298340-26488000</a> |
| I think there is an area of maintenance which isn't covered. I have many patients with, for example, work related pain - lifting etc - and they come maybe monthly for an MOT as they call it. Acupuncture is invaluable to them but can't be said to cure their problems.                                                                                                                                                                                               | <a href="#">298348-298340-26489299</a> |
| Red heads respond well and may have an "over response"                                                                                                                                                                                                                                                                                                                                                                                                                   | <a href="#">298348-298340-26626426</a> |
